# Supplementary material for: The Communities First (ComFi) study: protocol for a prospective controlled quasi-experimental study to evaluate the impact of area-wide regeneration on mental health and social cohesion in deprived communities
Source: PubMed Central journal article supplement (PMC4202000; doi:10.1136/bmjopen-2014-006530), 2014-10-14
Supplement: bmjopen-2014-006530.draft_revisions.pdf [file bmjopen-2014-006530.draft_revisions.pdf]

# BMJ Open

## The Communities First (ComFi) study: protocol for a prospective controlled quasi-experimental study to evaluate the impact of area-wide regeneration on mental health and social cohesion in deprived communities

|                                 |                                                                                                                                                                                                                                                                                                                                                                                                                                                                                                                                                                                                                                                                                                                                                                                                                                                                                                                                               |
|---------------------------------|-----------------------------------------------------------------------------------------------------------------------------------------------------------------------------------------------------------------------------------------------------------------------------------------------------------------------------------------------------------------------------------------------------------------------------------------------------------------------------------------------------------------------------------------------------------------------------------------------------------------------------------------------------------------------------------------------------------------------------------------------------------------------------------------------------------------------------------------------------------------------------------------------------------------------------------------------|
| Journal:                        | <i>BMJ Open</i>                                                                                                                                                                                                                                                                                                                                                                                                                                                                                                                                                                                                                                                                                                                                                                                                                                                                                                                               |
| Manuscript ID:                  | bmjopen-2014-006530                                                                                                                                                                                                                                                                                                                                                                                                                                                                                                                                                                                                                                                                                                                                                                                                                                                                                                                           |
| Article Type:                   | Protocol                                                                                                                                                                                                                                                                                                                                                                                                                                                                                                                                                                                                                                                                                                                                                                                                                                                                                                                                      |
| Date Submitted by the Author:   | 02-Sep-2014                                                                                                                                                                                                                                                                                                                                                                                                                                                                                                                                                                                                                                                                                                                                                                                                                                                                                                                                   |
| Complete List of Authors:       | White, James; Cardiff University, Centre for the Development and Evaluation of Complex Interventions for Public Health Improvement<br>Greene, Giles; Cardiff University, South East Wales Trials Unit<br>Dunstan, FDJ; Cardiff University, Institute of Primary Care and Public Health<br>Rodgers, Sarah; University of Wales Swansea, Farr Institute<br>Lyons, Ronan; University of Wales Swansea, Farr Institute<br>Humphreys, Ioan; Swansea University, Centre for Health Economics<br>John, Ann; Swansea University, Farr Institute<br>Webster, Chris; The University of Hong Kong, Faculty of Architecture<br>Palmer, Stephen; Cardiff University, Institute of Primary Care and Public Health<br>Elliot, Eva; Cardiff University, Cardiff Institute of Society, Health and Wellbeing<br>Phillips, Ceri; Swansea University, Centre for Health Economics<br>Fone, David; Cardiff University, Institute of Primary Care and Public Health |
| <b>Primary Subject Heading</b>: | Mental health                                                                                                                                                                                                                                                                                                                                                                                                                                                                                                                                                                                                                                                                                                                                                                                                                                                                                                                                 |
| Secondary Subject Heading:      | Public health                                                                                                                                                                                                                                                                                                                                                                                                                                                                                                                                                                                                                                                                                                                                                                                                                                                                                                                                 |
| Keywords:                       | MENTAL HEALTH, PUBLIC HEALTH, EPIDEMIOLOGY                                                                                                                                                                                                                                                                                                                                                                                                                                                                                                                                                                                                                                                                                                                                                                                                                                                                                                    |
|                                 |                                                                                                                                                                                                                                                                                                                                                                                                                                                                                                                                                                                                                                                                                                                                                                                                                                                                                                                                               |

SCHOLARONE™  
Manuscripts

1  
2  
3  
4  
5  
6  
7  
8  
9  
10  
11  
12  
13  
14  
15  
16  
17  
18  
19  
20  
21  
22  
23  
24  
25  
26  
27  
28  
29  
30  
31  
32  
33  
34  
35  
36  
37  
38  
39  
40  
41  
42  
43  
44  
45  
46  
47  
48  
49  
50  
51  
52  
53  
54  
55  
56  
57  
58  
59  
60

**The Communities First (ComFi) study: protocol for a prospective controlled quasi-experimental study to evaluate the impact of area-wide regeneration on mental health and social cohesion in deprived communities**

Authors:

James White<sup>1,2</sup> whitej11@cf.ac.uk  
Giles Greene<sup>1</sup> greeneg@cardiff.ac.uk  
Frank Dunstan<sup>3</sup> dunstanfd@cardiff.ac.uk  
Sarah Rodgers<sup>4</sup> s.e.rodgers@Swansea.ac.uk  
Ronan A Lyons<sup>4</sup> r.a.lyons@swansea.ac.uk  
Ioan Humphreys<sup>5</sup> i.humphreys@swansea.ac.uk  
Ann John<sup>4</sup> a.john@swansea.ac.uk  
Chris Webster<sup>6</sup> cwebster@hku.hk  
Stephen Palmer<sup>3</sup> palmersr@cardiff.ac.uk  
Eva Elliott<sup>7</sup> elliotte@cardiff.ac.uk  
Ceri J Phillips<sup>5</sup> c.j.phillips@swansea.ac.uk  
David Fone<sup>3</sup> foned@cardiff.ac.uk

<sup>1</sup> South East Wales Trials Unit (SEWTU), School of Medicine, 4th floor Neuadd Meirionnydd, Heath Park, Cardiff. CF14 4YS.

<sup>2</sup> Centre for the Development and Evaluation of Complex Interventions for Public Health Improvement (DECIPHer), School of Medicine, Heath Park, Cardiff. CF14 4YS.

<sup>3</sup> Institute of Primary Care & Public Health, Neuadd Meirionnydd, School of Medicine, Cardiff University, Heath Park, Cardiff. CF14 4YS.

<sup>4</sup> Farr Institute, College of Medicine, Swansea University, Swansea. SA2 8PP.

1  
2  
3  
4  
5  
6  
7  
8  
9  
10  
11  
12  
13  
14  
15  
16  
17  
18  
19  
20  
21  
22  
23  
24  
25  
26  
27  
28  
29  
30  
31  
32  
33  
34  
35  
36  
37  
38  
39  
40  
41  
42  
43  
44  
45  
46  
47  
48  
49  
50  
51  
52  
53  
54  
55  
56  
57  
58  
59  
60

<sup>5</sup> Swansea Centre for Health Economics, College of Human and Health Sciences, Swansea University, Singleton Park, Swansea. SA2 8PP.

<sup>6</sup> The University of Hong Kong, Faculty of Architecture, Department of Urban Planning and Design, Pokfulam, Hong Kong.

<sup>7</sup> Cardiff Institute of Society, Health and Wellbeing (CISHeW), School of Social Sciences, Cardiff University, 12 Museum Place, Cardiff. CF10 3BG.

Corresponding author: Dr James White

Telephone 02920 687243/ 875184, Fax 02920 687611

email: [whitej11@cf.ac.uk](mailto:whitej11@cf.ac.uk)

## Abstract

**Introduction:** Recent systematic reviews have highlighted the dearth of evidence on the effectiveness of regeneration on health and health inequalities. 'Communities First' is an area-wide regeneration scheme to improve the lives of people living in the most deprived areas in Wales (United Kingdom). This study will evaluate the impact of Communities First on residents' mental health and social cohesion.

**Methods and analysis:** A prospective controlled quasi-experimental study of the association between residence in Communities First regeneration areas in Caerphilly county borough and change in mental health and social cohesion. The study population is the 4226 residents aged 18-74 years who responded to the Caerphilly Health and Social Needs Study in 2001 (before delivery) and 2008 (after delivery of Communities First). Data on the location, type and cost of Communities First interventions will be extracted from records collected by Caerphilly county borough council. The primary outcome is the change in mental health between 2001 and 2008. Secondary outcomes are changes: in common mental disorder case status (using survey and General Practice data), social cohesion and mental health inequalities. Multilevel models will examine change in mental health and social cohesion between Communities First and control areas, adjusting for individual and household level confounding factors. Further models will examine the effects of (1) different types of intervention, (2) contamination across areas, (3) length of residence in a Communities First area, and (4) population migration. We will carry out a cost-consequences analysis to summarize the outcomes generated for participants, as well as service utilization and utility gains.

**Ethics and dissemination:** This study has had approval from the Information Governance Review Panel at Swansea University (Ref: 0266 CF). Findings will be disseminated through peer-review publications, international conferences, policy and practice partners in local and

1 national government, and updates on our study website ([http://medicine.cardiff.ac.uk/clinical-](http://medicine.cardiff.ac.uk/clinical-study/communities-first-regeneration-programme/)  
2 [study/communities-first-regeneration-programme/](http://medicine.cardiff.ac.uk/clinical-study/communities-first-regeneration-programme/).  
3  
4  
5  
6  
7  
8  
9

### 10 **Strengths and limitations of this study**

- 11  
12  
13 • The study is a prospective controlled evaluation of a natural experiment which has  
14 detailed mental health data from an anonymously record-linked prospective cohort  
15 (eCATALyST) and General Practice such that we will have detailed assessments on  
16 individual and household-level social, economic and health-based confounding  
17 factors.  
18  
19
- 20 • The study is sufficiently powered to detect an effect of the Communities First  
21 programme on mental health, and the cost consequences of the intervention will be  
22 assessed.  
23  
24  
25  
26  
27  
28  
29  
30  
31  
32  
33

34 **Keywords:** Regeneration, Mental health, Social cohesion, Natural experiment, Data linkage,  
35  
36  
37 Multilevel analysis  
38  
39  
40  
41  
42  
43  
44  
45  
46  
47  
48  
49  
50  
51  
52  
53  
54  
55  
56  
57  
58  
59  
60

## Introduction

1  
2  
3  
4  
5 Recently there has been political appetite for large scale programmes to address the wider  
6  
7 social, economic and environmental determinants of poor health through urban regeneration  
8  
9 and neighbourhood renewal projects. It is estimated that in the last 20 years over £11 billion  
10  
11 has been spent on these schemes in the United Kingdom [1]. These regeneration schemes are  
12  
13 typically designed to improve the likelihood of employment, education, and social support  
14  
15 within economically deprived communities, rather than to directly improve health. The  
16  
17 interventions delivered in these schemes therefore include a broad range of regeneration  
18  
19 activities to: 1) improve the built environment: increase access to public transport, create or  
20  
21 maintain green space, 2) improve housing quality: provide free loft insulation, double glazing  
22  
23 [2, 3], 3) reduce crime and promote safety: install street lighting, alarms, traffic calming and  
24  
25 pedestrian zones, 4) reduce environmental stressors such as litter and noise, and 5) promote  
26  
27 social support and contact between residents: by building or staffing youth clubs, providing  
28  
29 sports equipment; setting up luncheon or widows clubs [4]. Although there has been a  
30  
31 number of systematic reviews examining on the health impacts of housing improvement [5,  
32  
33 6], and a few evaluations area-regeneration schemes on short-term changes in employment,  
34  
35 education and income [7, 8], there is a dearth of evidence on the effectiveness of area-wide  
36  
37 regeneration schemes on health outcomes [1].  
38  
39  
40  
41  
42  
43  
44  
45

46 We identified three studies which have evaluated the impact of area-regeneration schemes on  
47  
48 mental health [9, 10]. An evaluation of the New Deal for Communities, delivered in deprived  
49  
50 areas in England, found no difference in the change in mental health scores (2002 to 2008)  
51  
52 between residents of New Deal areas and residents randomly sampled from non-contiguous  
53  
54 comparator areas [9]; or participants in the Health Survey for England stratified according to  
55  
56 levels of area-deprivation [10]. An evaluation of the Go Well regeneration programme, based  
57  
58  
59  
60

1  
2 in Glasgow reported a small improvement in mental health was associated with housing  
3 repairs and improvements, but no difference in mental health between residents living in  
4 intervention areas being demolished compared to residents from matched control areas [11].  
5  
6  
7  
8  
9

10  
11  
12 ‘Communities First’ is a Welsh Assembly Government programme of area-wide regeneration  
13 delivered in the most deprived communities in Wales. Communities First has spent around  
14 £300 million up until 2012 (equivalent to an average of some £200,000 per community or  
15 around £55 per resident per annum).[12] To date, evaluations of Communities First have  
16 included two reports based on process data which suggested the scheme was viewed  
17 positively by residents and may have had a beneficial effect on physical health [13, 14]; and  
18 another evaluation of the Communities First Support Network made recommendations on  
19 how best to support the Communities First programmes [15]. A comparison across Wales  
20 between residents who did and did not live in a Communities First area using routine  
21 government data aggregated at a small area level suggested there was very little impact on  
22 levels of unemployment, unemployment benefit, educational achievement, and crime. There  
23 was, however, no evaluation of Communities First on mental health [14].  
24  
25  
26  
27  
28  
29  
30  
31  
32  
33  
34  
35  
36  
37  
38  
39  
40  
41

42 The proposed study exploits an opportunity to nest a prospective controlled quasi-  
43 experimental to investigate the effects of Communities First within an electronic record-  
44 linked prospective cohort, the Caerphilly Health & Social Needs Electronic Cohort Study  
45 (eCATALYST) [16]. We will collect information on the type, location and costs of  
46 Communities First interventions in Caerphilly which will be anonymously record-linked to  
47 eCATALYST study. The eCATALYST study collected data on mental health, social cohesion  
48 before and after the Communities First programme, from residents who did and did not reside  
49 in Communities First areas, as well as providing detailed assessments on changes in  
50  
51  
52  
53  
54  
55  
56  
57  
58  
59  
60

1 household and individual-level socioeconomic status. We will also collect mental health data  
2  
3  
4 from General Practice to triangulate results derived from cohort and routine data.  
5  
6  
7

### 8 **Aims and objectives:**

9  
10 This study will examine the association between residence in a Communities First area and  
11  
12 changes in mental health and social cohesion in a prospective controlled quasi-experimental,  
13  
14 or 'natural experiment' design, set in a general adult population sample. Our primary objective  
15  
16 is to determine:  
17

- 18  
19  
20 1. What is the impact of the *Communities First* regeneration programme on mental  
21  
22 health?  
23  
24

25 The interventions delivered as part of Communities First may also have an effect on levels of  
26  
27 social cohesion. This association could occur through the positive individual and community  
28  
29 effects of interventions on local friendship ties, collective attachment and rates of social  
30  
31 participation [17]. It is also clear that selective population migration needs to be taken into  
32  
33 account in any examination of health inequalities over time [18, 19], and that the costs and  
34  
35 benefits of interventions need to be assessed. Our secondary objectives therefore are to  
36  
37 determine:  
38  
39

- 40  
41  
42 1. What is the impact of the *Communities First* regeneration programme on social  
43  
44 cohesion?  
45
- 46  
47 2. To what extent does regeneration of a community result in population replacement  
48  
49 rather than regeneration?
- 50  
51 3. What is the impact of the Communities First programme on area-level inequalities in  
52  
53 mental health and well-being, taking population migration into account?  
54
- 55  
56 4. To what extent can the benefits of the *Communities First* programme be considered to  
57  
58 represent value for money?  
59  
60



## Methods and analysis

### Study design

The study will utilise intervention data and the eCATALyST study to create a prospective controlled quasi-experimental study - a 'natural experiment' [20].

### Setting

The study will be set in Caerphilly county borough, Wales, UK. Caerphilly borough has a population of around 178,000 with a large variation in levels of deprivation [21].

Communities First intervention areas account for roughly one-third of the Lower Super Output Areas (LSOAs) in Caerphilly and one-quarter of the resident population.

### Participants

Data have been collected from 4426 participants aged 18 to 74 years on 31 May 2001 who responded to both the 2001 and 2008 waves of the Caerphilly Health and Social Needs Electronic cohort study [16]. The prospective controlled quasi-experimental study involves a comparison of the 1,773 (40%) participants living in 47 LSOAs that received Communities First interventions between the two waves of data collection, with 2,653 subjects living in 63 LSOAs that did not receive any interventions (control areas; see figure 1).

### Use of existing record-linked datasets: the Secure Anonymous Information Linkage

#### Databank

The Secure Anonymous Information Linkage (SAIL) databank held within the Health Information Research Unit (HIRU) at Swansea University contains health, social and education data on three million residents of Wales, UK, and currently includes thirteen

1 datasets containing nearly one billion records [22, 23]. Information governance for SAIL is  
2  
3  
4 overseen by an Information Governance Review Panel [22]. The smallest geographical area  
5  
6 for which data are already linked and may be released from the databank, after scrutiny for  
7  
8 small numbers, is the 2001 Census LSOA.  
9

10  
11  
12  
13  
14 The Welsh Demographic Service (WDS) dataset held by NHS Wales Informatics Service  
15  
16 (NWIS), the NHS organisation in Wales mandated to hold personally identifiable data,  
17  
18 contains addresses for all individuals who register with a General Practitioner. Dates for each  
19  
20 address record update are held, thereby providing durations of residency for several different  
21  
22 homes and the ability to link to local environment exposures at each. This dataset will be  
23  
24 used to track population migration and record length of exposure in a Communities First area.  
25  
26 The WDS contains address information linked anonymously at the individual level (the  
27  
28 anonymised linking field, ALF) which is the primary key variable for record-linkage. Using a  
29  
30 split-file technique, NWIS supplies ALFs for the whole population of Wales to the SAIL  
31  
32 databank [22, 23].  
33  
34  
35  
36  
37  
38  
39

#### 40 **Communities First Intervention data**

41  
42  
43 We will extract detailed data on each regeneration activity, including a text description,  
44  
45 geographical location, duration, and investment (£) using information held by Caerphilly  
46  
47 county borough council. We propose to classify the interventions delivered as part of  
48  
49 Communities First into seven domains of regeneration, informed by a scheme used to  
50  
51 organise projects funded by the New Deal for Communities [4]. Examples are provided  
52  
53 below.  
54  
55  
56  
57  
58  
59  
60

- 1  
2  
3  
4  
5  
6  
7  
8  
9  
10  
11  
12  
13  
14  
15  
16  
17  
18  
19  
20  
21  
22  
23  
24  
25  
26  
27  
28  
29  
30  
31  
32  
33  
34  
35  
36  
37  
38  
39  
40  
41  
42  
43  
44  
45  
46  
47  
48  
49  
50  
51  
52  
53  
54  
55  
56  
57  
58  
59  
60
1. *Crime*. Reducing crime and the fear of crime through installing CCTV, street lighting and alarms;
2. *Education*. Providing educational support through after school/breakfast/holiday clubs, early learning and Sure Start;
3. *Health*. Projects to improve the health of residents directly through provision of sport equipment, staffing of sports clubs, health improvement interventions such as healthy eating projects;
4. *Housing and the physical environment*. Housing maintenance and repairs, environmental improvement such as redevelopment of waste land, maintenance of green space, parks, building of play grounds; building and maintenance of roads and cycle paths;
5. *Employment*. Improving employment prospects included providing advice to businesses; projects to develop of computer skills of the unemployed;
6. *Community*. Increasing social contact and participation including the building of community facilities, staffing of youth projects, funding of luncheon and widows clubs and community events;
7. *Infrastructure*. Spending on the running of the partnerships. This entailed spending on staff, stationary, and training.

The classification scheme may be amended following extraction of all information on interventions.

### **The Caerphilly Health and Social Needs Electronic Cohort (eCATALyST)**

The Caerphilly Health & Social Needs Electronic Cohort (eCATALyST) is a prospective cohort study residents of Caerphilly county borough, Wales, United Kingdom. The study has been described in detail elsewhere [16]. Briefly, in 2001 a stratified random sample of 22,236 individuals aged 18 and over resulted in 10,892 respondents providing valid information on

1 mental health. In 2008 the survey was repeated with 9,551 participants who still resided in  
2 the borough. Of these, 4,798 returned questionnaires, with 4,426 providing data on their  
3 mental health at both waves. The study has detailed information on a wide range of social,  
4 demographic, and economic risk factors (e.g. age, gender, socioeconomic status, educational  
5 achievement, employment, household income, council tax band) health and lifestyle outcome  
6 data (e.g. cardiovascular risk factors, SF-36v2 for the Mental Health Inventory scale [24],  
7 limiting long-term illness), and perceptions of neighbourhood, including the Buckner  
8 Neighbourhood Cohesion scale [25].  
9  
10  
11  
12  
13  
14  
15  
16  
17  
18  
19  
20  
21  
22

### 23 **Data from General Practice on consultations and prescribing**

24  
25  
26 The SAIL databank currently contains data on consultations and prescribing data for around  
27 40% of the Welsh population. To date, data from nine of the 29 GP practices in Caerphilly  
28 borough are record-linked in SAIL. This data will be used to compare information on  
29 common mental disorders from the eCATALyST dataset to that defined using data from  
30 General Practice. We have already defined a set of Read codes used by general practice to  
31 define a case of common mental disorder [26]. Although only around one-third of the survey  
32 dataset respondents will have linked GP data, this provides an opportunity to compare results  
33 for common mental disorders reported in the community survey to those that present to  
34 primary care.  
35  
36  
37  
38  
39  
40  
41  
42  
43  
44  
45  
46  
47  
48  
49

### 50 **Primary outcome: Mental health**

51  
52 Data on changes in mental health will be assessed using the 2001 and 2008 waves of  
53 eCATALyST. Mental health was assessed in 2001 and 2008 using the Mental Health  
54 Inventory (MHI-5) included in the SF-36 version 2 scale [27, 28]. The validity and reliability  
55  
56  
57  
58  
59  
60

1 of the MHI-5 are well established [28] and the scores reflect the continuously distributed  
2 nature of mental health status in the population [27, 28]. Respondents can achieve a total  
3 score within a range of 5 to 25, which can be transformed to a 0 to 100 scale [29, 30]. The  
4 primary outcome measure for the analysis is change in mental health score, wave 2 – wave 1,  
5 so that positive values indicate an improvement in mental health.  
6  
7  
8  
9  
10  
11  
12

13  
14  
15  
16 We will repeat our analysis using a set of Read codes used by general practice to represent  
17 the common mental disorders. The specific set of codes will build on work conducted by our  
18 group using data from General Practice to define a common mental disorder [26]. They will  
19 include codes for symptoms, diagnosis and treatments for psychiatric illnesses such as  
20 anxiety disorders and major depression.  
21  
22  
23  
24  
25  
26  
27  
28  
29  
30

### 31 **Secondary outcome measures**

#### 32 *Social cohesion*

33  
34  
35  
36  
37 Social cohesion was measured in both waves of eCATALyST study using a modified version  
38 of Buckner's Neighbourhood Cohesion Scale [23]. Social cohesion was measured using eight  
39 items: 'I visit my friends in their homes', 'The friendships and associations I have with other  
40 people in my neighbourhood mean a lot to me', 'If I need advice about something I could go  
41 to someone in my neighbourhood', 'I believe my neighbours would help in an emergency', 'I  
42 borrow things and exchange favours with my neighbours', 'I would be willing to work  
43 together with others on something to improve my neighbourhood', 'I rarely have a neighbour  
44 over to my house to visit' (reverse scored), and 'I regularly stop and talk with people in my  
45 neighbourhood'. We will derive small-area social cohesion scores using our ecometric  
46 methodology [31].  
47  
48  
49  
50  
51  
52  
53  
54  
55  
56  
57  
58  
59  
60

### **Mental health inequalities**

The eCATALyST study includes the following measures of socio-economic position at both waves [16]: Registrar General Social Class and the National Statistics Socio-economic Classification (NS-SEC) [32]; housing tenure; council tax band of residence; full classification of employment status; and gross household income in two bands (above and below 60% of median income). Using the Welsh Index of Multiple Deprivation (WIMD) 2005 we will categorise each of the LSOAs into quintiles (based on four cut-points and equal counts of LSOAs) for aggregate analyses and use the WIMD score as a LSOA-level covariate in statistical models.

### **Sample size**

In this prospective controlled quasi-experimental study the sample size is fixed and so we can calculate the power available to detect a clinically important difference in our primary outcome measure of mental health, the Mental Health Inventory (MHI-5) scale scores between groups. Of the 4,426 eligible survey participants, 1,773 reside in 47 intervention LSOAs and 2,653 in 63 control LSOAs. Comparing changes in the MHI-5 score between those living in regeneration areas and those living in control areas would have a power of 87% for detecting a difference of 2 in the mean score, allowing for clustering at LSOA-level. This is high power to detect a small, but clinically important, numerical difference in scores.

### **Statistical analysis plan**

1  
2  
3  
4  
5  
6  
7  
8  
9  
10  
11  
12  
13  
14  
15  
16  
17  
18  
19  
20  
21  
22  
23  
24  
25  
26  
27  
28  
29  
30  
31  
32  
33  
34  
35  
36  
37  
38  
39  
40  
41  
42  
43  
44  
45  
46  
47  
48  
49  
50  
51  
52  
53  
54  
55  
56  
57  
58  
59  
60

The primary analysis will examine the association between changes in MHI-5 scores and residence in a Communities First intervention area or control area. Data on individuals nested within LSOAs will be available. Our analysis plan is:

1. Descriptive statistics for change in mental health, social cohesion and socioeconomic covariates 2001 to 2008, comparing residents of Communities First and control areas;
2. Multilevel linear models to examine changes in MHI-5 scores (2001 to 2008) and multilevel logistic models for the odds of a case of common mental disorder between residents of Communities First and control areas, adjusting for compositional characteristics including baseline age, gender and transitions in individual-level covariates recorded in eCATALyST. We will adjust for LSOA deprivation using quintiles of the 2005 Welsh Index of Multiple Deprivation (WIMD)[33]. We will then include interaction terms to examine whether the effect of Communities First varies according to individual and LSOA-level social cohesion. To investigate the different types of interventions, we will repeat models replacing the binary term for residence in a Communities First or control area with a categorical term for the different types of interventions.

In order to address the secondary research questions:

3. We will fit further multilevel linear models described above to examine changes in levels of social cohesion;
4. We will assess the effect of population migration by including a term in these models for whether a participant has moved (yes/no) and whether that move was out of, or into, another Communities First LSOA. We will also compare a model, in which respondents are assumed not to have moved, with a model in which the correct migration is coded, following published methods[19].

- 1  
2  
3  
4  
5  
6  
7  
8  
9  
10  
11  
12  
13  
14  
15  
16  
17  
18  
19  
20  
21  
22  
23  
24  
25  
26  
27  
28  
29  
30  
31  
32  
33  
34  
35  
36  
37  
38  
39  
40  
41  
42  
43  
44  
45  
46  
47  
48  
49  
50  
51  
52  
53  
54  
55  
56  
57  
58  
59  
60
5. We will examine the effect of Communities First on mental health inequalities by modelling interactions between residence in a Communities First area and (i) baseline area deprivation Welsh Index of Multiple Deprivation (WIMD) 2005 scores [33] and, (ii) population sub-groups (e.g. gender, employment status);
6. A cost consequences analysis will be conducted and post-trial modelling employed to assess the cost consequences over longer time horizons than is possible within the study period. Changes in resources utilised over time in the Communities First areas relative to the control areas will be calculated and used in conjunction with the costs of setting up and delivering Communities First to generate the net cost of programme delivery per family; this will represent the incremental cost of providing the programme relative to usual service provision. The differences in primary, secondary and tertiary outcomes (including differences in utility scores derived from the SF-36 responses at each follow-up) will be used alongside the net cost of programme delivery to generate a set of indicators of relative cost-effectiveness within the study period, based on incremental cost and incremental outcomes [34]. These will be used to provide indicators of the extent to which the programme can be viewed as representing value for money.

We plan to conduct a number of sensitivity analyses to examine: 1) duration of exposure to Communities First by repeating models with length of residence rather than a binary term for exposure; and, 2) contamination using definitions of each type of intervention according to their likelihood for contamination. We will also explore analysis using propensity scores in an attempt to promote balance across intervention and control areas. We will write these models in MLWiN [35], Stata [36], or R [37].

### **Ethics and dissemination**



1 The study has been approved by the Information Governance Review Panel (IGRP) at  
2 Swansea University (Ref: 0266 CF) to link the Communities First intervention data to  
3  
4 outcome data from the eCATALyST study, General Practice records, as well as the WDS  
5  
6 within SAIL. The IGRP reviews all applications to the SAIL databank and members include  
7  
8 senior representatives from the British Medical Association (BMA), the National Research  
9  
10 Ethics Service (NRES), Public Health Wales, NHS Wales Informatics Service (NWIS), and  
11  
12 Involving People. NRES does not consider that studies using only anonymised data require  
13  
14 its approval. The eCATALyST study received ethical approval for the baseline survey 2001  
15  
16 from the former Gwent Local Research Ethics Committee (REF: JW/CC/00/59(a)) and for  
17  
18 the wave 2 survey in 2008, approved by the SE Wales Research Ethics Committee Panel C  
19  
20 (ref 08/WSE03/25).  
21  
22  
23  
24

25  
26 Findings will be disseminated through standard academic pathways including peer-  
27  
28 review publications, presentations at national and international conferences, and updates on  
29  
30 our study website ([http://medicine.cardiff.ac.uk/clinical-study/communities-first-  
31  
32 regeneration-programme/](http://medicine.cardiff.ac.uk/clinical-study/communities-first-regeneration-programme/)). In addition, we will present our findings to policy partners in  
33  
34 Caerphilly county borough, Public Health Wales, the Welsh Government, as well as the  
35  
36 partnership boards who currently deliver Communities First.  
37  
38  
39  
40  
41

## 42 Discussion

43  
44  
45 The proposed study is highly policy relevant. The Marmot Review of Health Inequalities has  
46  
47 the creation of, “locally developed and evidence-based community regeneration  
48  
49 programmes” as an objective to improve health and reduce health inequalities by 2020 [38].  
50  
51 This study exploits an opportunity to construct a natural experiment to evaluate the impact of  
52  
53 a multi-million pound national regeneration programme on mental health. We will extract  
54  
55 data on the location and type of interventions and nest it within an anonymously record-  
56  
57  
58  
59  
60

1 linked prospective cohort (eCATALyST) so that we will have detailed assessments on  
2  
3 individual and household-level social, economic and health-based confounding factors which  
4  
5 have been linked with changes in mental health. These detailed assessments are not  
6  
7 commonly available in routine data sources which are typically used in prospective controlled  
8  
9 quasi-experimental study [20, 39]. These individual-level confounding factors will be  
10  
11 important in our planned analysis in the attempt to separate out the effects of Communities  
12  
13 First, delivered on the basis of residence in a deprived area, from that area and individual-  
14  
15 level socioeconomic disadvantage. Through linkage to routine data we can also examine  
16  
17 effects on common mental disorders that present in primary care and provide a more sensitive  
18  
19 assessment of exposure to the interventions funded by Communities First through  
20  
21 information on length of residence in a Communities First area provided by the WDS.  
22  
23  
24  
25  
26  
27  
28  
29  
30  
31  
32  
33  
34  
35  
36  
37  
38  
39  
40  
41  
42  
43  
44  
45  
46  
47  
48  
49  
50  
51  
52  
53  
54  
55  
56  
57  
58  
59  
60

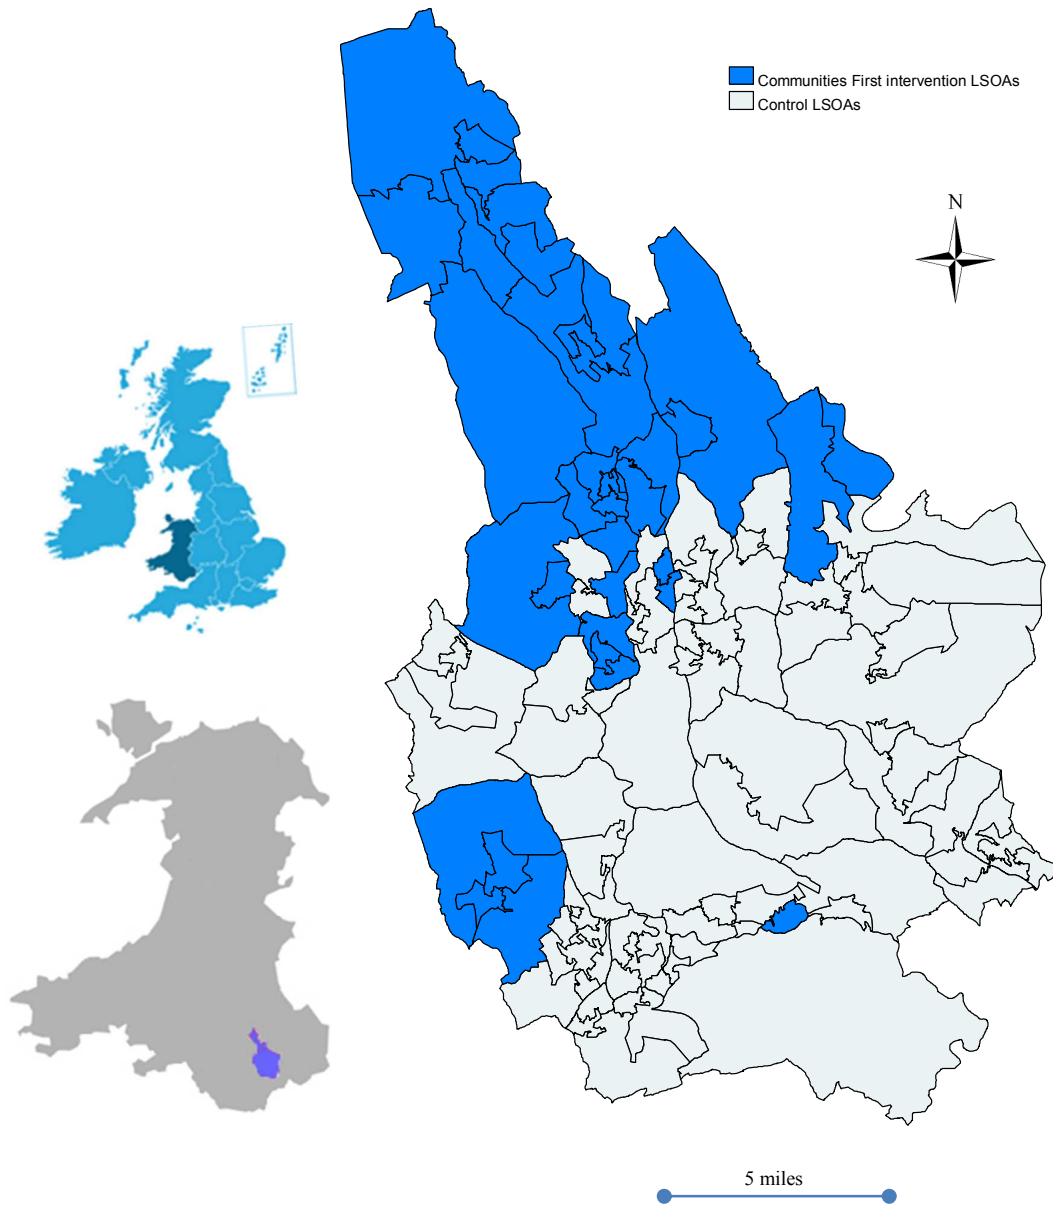

Figure 1: The 47 Communities First intervention LSOAs and 63 control LSOAs in Caerphilly County Borough (Wales, UK).

1  
2  
3  
4  
5  
6  
7  
8  
9  
10  
11  
12  
13  
14  
15  
16  
17  
18  
19  
20  
21  
22  
23  
24  
25  
26  
27  
28  
29  
30  
31  
32  
33  
34  
35  
36  
37  
38  
39  
40  
41  
42  
43  
44  
45  
46  
47  
48  
49  
50  
51  
52  
53  
54  
55  
56  
57  
58  
59  
60

## Competing interests

The author(s) declare that they have no competing interests.

## Acknowledgements

This project is funded by the National Institute for Social Care and Health Research (NISCHR) programme (project reference RFS-12-05). We should like to thank the participants of the eCATALyST studies and many of the staff of the former Gwent Health Authority, the Caerphilly Local Health Group and their successor organisations, and the Chief Executive's Office and the Electoral Services Department of Caerphilly county borough council for their help. This study makes use of anonymised data held in the Secure Anonymised Information Linkage (SAIL) system, which is part of the national e-health records research infrastructure for Wales. We would like to acknowledge all the data providers who make anonymised data available for research.

The work was undertaken with the support of The Centre for the Development and Evaluation of Complex Interventions for Public Health Improvement (DECIPHer), a UKCRC Public Health Research Centre of Excellence. Joint funding (MR/KO232331/1) from the British Heart Foundation, Cancer Research UK, Economic and Social Research Council, Medical Research Council, the Welsh Government and the Wellcome Trust, under the auspices of the UK Clinical Research Collaboration, is gratefully acknowledged. This work was also supported by the Farr Institute of Health Informatics Research. The Farr Institute is supported by a consortium of ten UK research organisations: Arthritis Research UK, the British Heart Foundation, Cancer Research UK, the Economic and Social Research Council, the Engineering and Physical Sciences Research Council, the Medical Research Council, the National Institute of Health Research, the National Institute for Social Care and Health

1 Research (Welsh Government) and the Chief Scientist Office (Scottish Government Health  
2 Directorates).  
3  
4  
5  
6  
7  
8  
9

### 10 **Authors' contributions**

11  
12  
13 All authors made a substantial contribution to the design of the study. JW is principal  
14 investigator. DF is the principal investigator on the eCATALyST study. GG, JW, and DF  
15 critically appraised the research papers. CW, DF, SP and EE designed the methods  
16 classifying interventions funded by Communities First. FD, SR and DF designed the  
17 statistical analysis. RAL, AJ and SR led the use of SAIL methodology. IH and CP designed  
18 the cost-effectiveness analysis. JW and GG wrote the manuscript and all authors contributed  
19 to critical revision of the final version. All authors read and approved the final manuscript  
20 and the decision to submit the manuscript for publication.  
21  
22  
23  
24  
25  
26  
27  
28  
29  
30  
31  
32  
33  
34  
35  
36  
37  
38  
39  
40  
41  
42  
43  
44  
45  
46  
47  
48  
49  
50  
51  
52  
53  
54  
55  
56  
57  
58  
59  
60

## References

- 1 Thomson H, Atkinson R, Petticrew M, *et al.* Do urban regeneration programmes improve public health and reduce health inequalities? A synthesis of the evidence from UK policy and practice (1980–2004). *Journal of Epidemiology and Community Health* 2006;**60**:108–115. doi:10.1136/jech.2005.038885
- 2 Egan M, Kearns A, Mason P, *et al.* Protocol for a mixed methods study investigating the impact of investment in housing, regeneration and neighbourhood renewal on the health and wellbeing of residents: the GoWell programme. *BMC medical research methodology* 2010;**10**:41.
- 3 Rodgers SE, Heaven M, Lacey A, *et al.* Cohort Profile: The Housing Regeneration and Health Study. *Int J Epidemiol* 2014;**43**:52–60. doi:10.1093/ije/dys200
- 4 Gutiérrez Romero R. Estimating the impact of England’s area-based intervention ‘New Deal for Communities’ on employment. *Regional Science and Urban Economics* 2009;**39**:323–31.
- 5 Thomson H, Thomas S, Sellstrom E, *et al.* The health impacts of housing improvement: a systematic review of intervention studies from 1887 to 2007. *American journal of public health* 2009;**99**:S681.
- 6 Thomson H, Petticrew M, Morrison D. Health effects of housing improvement: systematic review of intervention studies. *BMJ* 2001;**323**:187–90.
- 7 Batty E. Addressing Educational Disadvantage in Deprived Communities: Evidence from the New Deal for Communities Programme in England. *Urban Stud* 2012;:0042098012465129. doi:10.1177/0042098012465129
- 8 Belsky J, Melhuish EC, Barnes J. *The national evaluation of Sure Start: does area-based early intervention work?* Policy Press 2007.  
[http://books.google.com/books?hl=en&lr=&id=hL8rZuMN3SMC&oi=fnd&pg=PR5&dq=The+national+evaluation+of+Sure+Start:+does+area-based+early+intervention+work%3F&ots=E3W1IZiGWP&sig=HgyHJvBNuLWZektCuN\\_HKL1i97E](http://books.google.com/books?hl=en&lr=&id=hL8rZuMN3SMC&oi=fnd&pg=PR5&dq=The+national+evaluation+of+Sure+Start:+does+area-based+early+intervention+work%3F&ots=E3W1IZiGWP&sig=HgyHJvBNuLWZektCuN_HKL1i97E) (accessed 11 Aug2014).
- 9 Stafford M, Nazroo J, Popay JM, *et al.* Tackling inequalities in health: evaluating the New Deal for Communities initiative. *J Epidemiol Community Health* 2008;**62**:298–304. doi:10.1136/jech.2006.058628
- 10 Stafford M, Badland H, Nazroo J, *et al.* Evaluating the health inequalities impact of area-based initiatives across the socioeconomic spectrum: a controlled intervention study of the New Deal for Communities, 2002–2008. *Journal of epidemiology and community health* 2014;:jech-2014.
- 11 Egan M, Katikireddi SV, Kearns A, *et al.* Health effects of neighborhood demolition and housing improvement: a prospective controlled study of 2 natural experiments in urban renewal. *Am J Public Health* 2013;**103**:e47–53. doi:10.2105/AJPH.2013.301275
- 12 Government Social Research. The Evaluation of Communities First. 2011.  
<http://wales.gov.uk/docs/dsjlg/publications/comm/110913evalreporten.pdf>

- 1  
2  
3  
4  
5  
6  
7  
8  
9  
10  
11  
12  
13  
14  
15  
16  
17  
18  
19  
20  
21  
22  
23  
24  
25  
26  
27  
28  
29  
30  
31  
32  
33  
34  
35  
36  
37  
38  
39  
40  
41  
42  
43  
44  
45  
46  
47  
48  
49  
50  
51  
52  
53  
54  
55  
56  
57  
58  
59  
60
- 13 Welsh Assembly Government. Interim evaluation of Communities First. 2006. <http://wales.gov.uk/dsjlg/research/c1stinterim/reporte.pdf?lang=en>
  - 14 Welsh Government. Evaluation of Communities First. 2011. <http://wales.gov.uk/docs/caecd/research/110913-evaluation-communities-first-en.pdf>
  - 15 Welsh Assembly Government. Evaluation of the Communities First Support Network. 2007. <http://wales.gov.uk/dsjlg/research/cfsupportnetwork/finalreport.pdf?lang=en>
  - 16 Fone DL, Dunstan F, White J, *et al.* Cohort Profile: The Caerphilly Health and Social Needs Electronic Cohort Study (E-CATALyST). *Int J Epidemiol* Published Online First: 5 November 2012. doi:10.1093/ije/dys175
  - 17 Oishi S, Rothman AJ, Snyder M, *et al.* The socioecological model of procommunity action: the benefits of residential stability. *J Pers Soc Psychol* 2007;**93**:831–44. doi:10.1037/0022-3514.93.5.831
  - 18 Connolly S, O'Reilly D, Rosato M. Increasing inequalities in health: Is it an artefact caused by the selective movement of people? *Social science & medicine* 2007;**64**:2008–15.
  - 19 Norman P, Boyle P, Rees P. Selective migration, health and deprivation: a longitudinal analysis. *Social Science & Medicine* 2005;**60**:2755–71.
  - 20 Craig P, Cooper C, Gunnell D, *et al.* Using natural experiments to evaluate population health interventions: new Medical Research Council guidance. *Journal of epidemiology and community health* Published Online First: 10 May 2012. doi:10.1136/jech-2011-200375
  - 21 Office for National Statistics. 2011 Census. Office for National Statistics. 2012. <http://www.ons.gov.uk/ons/rel/census/2011-census/population-and-household-estimates-for-wards-and-output-areas-in-england-and-wales/index.html> (accessed 11 Aug2014).
  - 22 Ford D, Jones K, Verplancke JP, *et al.* The SAIL Databank: building a national architecture for e-health research and evaluation. *BMC health services research* 2009;**9**:157.
  - 23 Lyons R, Jones K, John G, *et al.* The SAIL databank: linking multiple health and social care datasets. *BMC medical informatics and decision making* 2009;**9**:3.
  - 24 Ware JE, Kosinski M, Dewey JE, *et al.* *SF-36 health survey: manual and interpretation guide*. Quality Metric Inc. 2000.
  - 25 Buckner JC. The development of an instrument to measure neighborhood cohesion. *American Journal of Community Psychology* 1988;**16**:771–91.
  - 26 Fone DL, Dunstan F, John A, *et al.* Associations between common mental disorders and the Mental Illness Needs Index in community settings Multilevel analysis. *BJP* 2007;**191**:158–63. doi:10.1192/bjp.bp.106.027458
  - 27 Ware JE, Kosinski M, Dewey JE. How to Score Version Two of the SF-36 Health Survey. *Lincoln, RI: QualityMetric* 2000.

- 1  
2  
3  
4  
5  
6  
7  
8  
9  
10  
11  
12  
13  
14  
15  
16  
17  
18  
19  
20  
21  
22  
23  
24  
25  
26  
27  
28  
29  
30  
31  
32  
33  
34  
35  
36  
37  
38  
39  
40  
41  
42  
43  
44  
45  
46  
47  
48  
49  
50  
51  
52  
53  
54  
55  
56  
57  
58  
59  
60
- 28 Ware Jr JE, Gandek B. Overview of the SF-36 health survey and the international quality of life assessment (IQOLA) project. *Journal of clinical epidemiology* 1998;**51**:903–12.
- 29 Kelly MJ, Dunstan FD, Lloyd K, *et al.* Evaluating cutpoints for the MHI-5 and MCS using the GHQ-12: A comparison of five different methods. *BMC Psychiatry* 2008;**8**:10.
- 30 Fone D, Greene G, Farewell D, *et al.* Common mental disorders, neighbourhood income inequality and income deprivation: small-area multilevel analysis. *BJP* 2013;**202**:286–93. doi:10.1192/bjp.bp.112.116178
- 31 Fone DL, Farewell DM, Dunstan FD. An ecometric analysis of neighbourhood cohesion. *Population Health Metrics* 2006;**4**:17.
- 32 Rose D, Pevalin DJ. *A researcher's guide to the national statistics socio-economic classification*. SAGE Publications Ltd 2003.
- 33 Welsh Assembly Government. Welsh Index of Multiple Deprivation 2005. Welsh Assembly Government 2005. <http://wales.gov.uk/docs/statistics/2005/051208wimd2005localreviseden.pdf>
- 34 Drummond MF, Sculpher MJ, Torrance GW. *Methods for the economic evaluation of health care programmes*. Oxford University Press, USA 2005.
- 35 Rasbash J, Browne W, Goldstein H, *et al.* *A user's guide to MLwiN*. University of London, Institute of Education, Centre for Multilevel Modelling 2000. <ftp://212.147.58.166/install/favre/documents%20r%E9cup%E9r%E9s/Folder111/Master%20en%20Sp%E9cialis%E9/Statistiques%20III%20-%20IV,%20Studer/StatisticsIV/MLwiNUserGuide.pdf> (accessed 29 Apr2014).
- 36 Stata | Stata 13. <http://www.stata.com/stata13/> (accessed 11 Aug2014).
- 37 Team RdC. R: A language and environment for statistical computing. *R foundation for Statistical Computing* Published Online First: 2005. [http://r-project.kr/sites/default/files/2%EA%B0%95%EA%B0%95%EC%A2%8C%EC%86%8C%EA%B0%9C\\_%EC%8B%A0%EC%A2%85%ED%99%94.pdf](http://r-project.kr/sites/default/files/2%EA%B0%95%EA%B0%95%EC%A2%8C%EC%86%8C%EA%B0%9C_%EC%8B%A0%EC%A2%85%ED%99%94.pdf) (accessed 29 Apr2014).
- 38 Marmot MG, Allen J, Goldblatt P, *et al.* Fair society, healthy lives: Strategic review of health inequalities in England post-2010. Published Online First: 2010. <http://eprints.ucl.ac.uk/111743/> (accessed 2 Sep2014).
- 39 Lyons RA, Ford DV, Moore L, *et al.* Use of data linkage to measure the population health effect of non-health-care interventions. *The Lancet* 2014;**383**:1517–9.



# BMJ Open

## The Communities First (ComFi) study: protocol for a prospective controlled quasi-experimental study to evaluate the impact of area-wide regeneration on mental health and social cohesion in deprived communities

|                                 |                                                                                                                                                                                                                                                                                                                                                                                                                                                                                                                                                                                                                                                                                                                                                                                                                                                                                                                                               |
|---------------------------------|-----------------------------------------------------------------------------------------------------------------------------------------------------------------------------------------------------------------------------------------------------------------------------------------------------------------------------------------------------------------------------------------------------------------------------------------------------------------------------------------------------------------------------------------------------------------------------------------------------------------------------------------------------------------------------------------------------------------------------------------------------------------------------------------------------------------------------------------------------------------------------------------------------------------------------------------------|
| Journal:                        | <i>BMJ Open</i>                                                                                                                                                                                                                                                                                                                                                                                                                                                                                                                                                                                                                                                                                                                                                                                                                                                                                                                               |
| Manuscript ID:                  | bmjopen-2014-006530.R1                                                                                                                                                                                                                                                                                                                                                                                                                                                                                                                                                                                                                                                                                                                                                                                                                                                                                                                        |
| Article Type:                   | Protocol                                                                                                                                                                                                                                                                                                                                                                                                                                                                                                                                                                                                                                                                                                                                                                                                                                                                                                                                      |
| Date Submitted by the Author:   | 10-Sep-2014                                                                                                                                                                                                                                                                                                                                                                                                                                                                                                                                                                                                                                                                                                                                                                                                                                                                                                                                   |
| Complete List of Authors:       | White, James; Cardiff University, Centre for the Development and Evaluation of Complex Interventions for Public Health Improvement<br>Greene, Giles; Cardiff University, South East Wales Trials Unit<br>Dunstan, FDJ; Cardiff University, Institute of Primary Care and Public Health<br>Rodgers, Sarah; University of Wales Swansea, Farr Institute<br>Lyons, Ronan; University of Wales Swansea, Farr Institute<br>Humphreys, Ioan; Swansea University, Centre for Health Economics<br>John, Ann; Swansea University, Farr Institute<br>Webster, Chris; The University of Hong Kong, Faculty of Architecture<br>Palmer, Stephen; Cardiff University, Institute of Primary Care and Public Health<br>Elliot, Eva; Cardiff University, Cardiff Institute of Society, Health and Wellbeing<br>Phillips, Ceri; Swansea University, Centre for Health Economics<br>Fone, David; Cardiff University, Institute of Primary Care and Public Health |
| <b>Primary Subject Heading</b>: | Mental health                                                                                                                                                                                                                                                                                                                                                                                                                                                                                                                                                                                                                                                                                                                                                                                                                                                                                                                                 |
| Secondary Subject Heading:      | Public health                                                                                                                                                                                                                                                                                                                                                                                                                                                                                                                                                                                                                                                                                                                                                                                                                                                                                                                                 |
| Keywords:                       | MENTAL HEALTH, PUBLIC HEALTH, EPIDEMIOLOGY                                                                                                                                                                                                                                                                                                                                                                                                                                                                                                                                                                                                                                                                                                                                                                                                                                                                                                    |
|                                 |                                                                                                                                                                                                                                                                                                                                                                                                                                                                                                                                                                                                                                                                                                                                                                                                                                                                                                                                               |

SCHOLARONE™  
Manuscripts

**The Communities First (ComFi) study: protocol for a prospective controlled quasi-experimental study to evaluate the impact of area-wide regeneration on mental health and social cohesion in deprived communities**

Authors:

|                              |                            |
|------------------------------|----------------------------|
| James White <sup>1,2</sup>   | whitej11@cf.ac.uk          |
| Giles Greene <sup>1</sup>    | greeneg@cardiff.ac.uk      |
| Frank Dunstan <sup>3</sup>   | dunstanfd@cardiff.ac.uk    |
| Sarah Rodgers <sup>4</sup>   | s.e.rodgers@Swansea.ac.uk  |
| Ronan A Lyons <sup>4</sup>   | r.a.lyons@swansea.ac.uk    |
| Ioan Humphreys <sup>5</sup>  | i.humphreys@swansea.ac.uk  |
| Ann John <sup>4</sup>        | a.john@swansea.ac.uk       |
| Chris Webster <sup>6</sup>   | cwebster@hku.hk            |
| Stephen Palmer <sup>3</sup>  | palmersr@cardiff.ac.uk     |
| Eva Elliott <sup>7</sup>     | elliotte@cardiff.ac.uk     |
| Ceri J Phillips <sup>5</sup> | c.j.phillips@swansea.ac.uk |
| David Fone <sup>3</sup>      | foned@cardiff.ac.uk        |

<sup>1</sup> South East Wales Trials Unit (SEWTU), School of Medicine, 4th floor Neuadd Meirionnydd, Heath Park, Cardiff. CF14 4YS.

<sup>2</sup> Centre for the Development and Evaluation of Complex Interventions for Public Health Improvement (DECIPHer), School of Medicine, Heath Park, Cardiff. CF14 4YS.

<sup>3</sup> Institute of Primary Care & Public Health, Neuadd Meirionnydd, School of Medicine, Cardiff University, Heath Park, Cardiff. CF14 4YS.

<sup>4</sup> Farr Institute, College of Medicine, Swansea University, Swansea. SA2 8PP.

1  
2  
3  
4  
5  
6  
7  
8  
9  
10  
11  
12  
13  
14  
15  
16  
17  
18  
19  
20  
21  
22  
23  
24  
25  
26  
27  
28  
29  
30  
31  
32  
33  
34  
35  
36  
37  
38  
39  
40  
41  
42  
43  
44  
45  
46  
47  
48  
49  
50  
51  
52  
53  
54  
55  
56  
57  
58  
59  
60

<sup>5</sup> Swansea Centre for Health Economics, College of Human and Health Sciences, Swansea University, Singleton Park, Swansea. SA2 8PP.

<sup>6</sup> The University of Hong Kong, Faculty of Architecture, Department of Urban Planning and Design, Pokfulam, Hong Kong.

<sup>7</sup> Cardiff Institute of Society, Health and Wellbeing (CISHeW), School of Social Sciences, Cardiff University, 12 Museum Place, Cardiff. CF10 3BG.

Corresponding author: Dr James White

Telephone 02920 687243/ 875184, Fax 02920 687611

email: [whitej11@cf.ac.uk](mailto:whitej11@cf.ac.uk)

## Abstract

**Introduction:** Recent systematic reviews have highlighted the dearth of evidence on the effectiveness of regeneration on health and health inequalities. 'Communities First' is an area-wide regeneration scheme to improve the lives of people living in the most deprived areas in Wales (United Kingdom). This study will evaluate the impact of Communities First on residents' mental health and social cohesion.

**Methods and analysis:** A prospective controlled quasi-experimental study of the association between residence in Communities First regeneration areas in Caerphilly county borough and change in mental health and social cohesion. The study population is the 4226 residents aged 18-74 years who responded to the Caerphilly Health and Social Needs Study in 2001 (before delivery) and 2008 (after delivery of Communities First). Data on the location, type and cost of Communities First interventions will be extracted from records collected by Caerphilly county borough council. The primary outcome is the change in mental health between 2001 and 2008. Secondary outcomes are changes: in common mental disorder case status (using survey and general practice data), social cohesion and mental health inequalities. Multilevel models will examine change in mental health and social cohesion between Communities First and control areas, adjusting for individual and household level confounding factors. Further models will examine the effects of (1) different types of intervention, (2) contamination across areas, (3) length of residence in a Communities First area, and (4) population migration. We will carry out a cost-consequences analysis to summarize the outcomes generated for participants, as well as service utilization and utility gains.

**Ethics and dissemination:** This study has had approval from the Information Governance Review Panel at Swansea University (Ref: 0266 CF). Findings will be disseminated through peer-review publications, international conferences, policy and practice partners in local and

1 national government, and updates on our study website ([http://medicine.cardiff.ac.uk/clinical-](http://medicine.cardiff.ac.uk/clinical-study/communities-first-regeneration-programme/)  
2 [study/communities-first-regeneration-programme/](http://medicine.cardiff.ac.uk/clinical-study/communities-first-regeneration-programme/)).  
3  
4  
5  
6  
7  
8  
9

### 10 **Strengths and limitations of this study**

- 11  
12  
13 • The study is a prospective controlled evaluation of a natural experiment which has  
14 detailed mental health data from an anonymously record-linked prospective cohort  
15 (eCATALyST) and general practice such that we will have detailed assessments on  
16 individual and household-level social, economic and health-based confounding  
17 factors.  
18  
19
- 20 • The study is sufficiently powered to detect an effect of the Communities First  
21 programme on mental health, and the cost consequences of the intervention will be  
22 assessed.  
23  
24  
25  
26  
27  
28  
29  
30  
31  
32  
33

34 **Keywords:** Regeneration, Mental health, Social cohesion, Natural experiment, Data linkage,  
35  
36  
37 Multilevel analysis  
38  
39  
40  
41  
42  
43  
44  
45  
46  
47  
48  
49  
50  
51  
52  
53  
54  
55  
56  
57  
58  
59  
60

## Introduction

1  
2  
3  
4  
5 Recently there has been political appetite for large scale programmes to address the wider  
6  
7 social, economic and environmental determinants of poor health through urban regeneration  
8  
9 and neighbourhood renewal projects. It is estimated that in the last 20 years over £11 billion  
10  
11 has been spent on these schemes in the United Kingdom [1]. These regeneration schemes are  
12  
13 typically designed to improve the likelihood of employment, education, and social support  
14  
15 within economically deprived communities, rather than to directly improve health. The  
16  
17 interventions delivered in these schemes therefore include a broad range of regeneration  
18  
19 activities to: 1) improve the built environment: increase access to public transport, create or  
20  
21 maintain green space, 2) improve housing quality: provide free loft insulation, double glazing  
22  
23 [2, 3], 3) reduce crime and promote safety: install street lighting, alarms, traffic calming and  
24  
25 pedestrian zones, 4) reduce environmental stressors such as litter and noise, and 5) promote  
26  
27 social support and contact between residents: by building or staffing youth clubs, providing  
28  
29 sports equipment; setting up luncheon or widows clubs [4]. Although there has been a  
30  
31 number of systematic reviews examining on the health impacts of housing improvement [5,  
32  
33 6], and a few evaluations area-regeneration schemes on short-term changes in employment,  
34  
35 education and income [7, 8], there is a dearth of evidence on the effectiveness of area-wide  
36  
37 regeneration schemes on health outcomes [1].  
38  
39  
40  
41  
42  
43  
44  
45

46 We identified three studies which have evaluated the impact of area-regeneration schemes on  
47  
48 mental health [9, 10]. An evaluation of the New Deal for Communities, delivered in deprived  
49  
50 areas in England, found no difference in the change in mental health scores (2002 to 2008)  
51  
52 between residents of New Deal areas and residents randomly sampled from non-contiguous  
53  
54 comparator areas [9]; or participants in the Health Survey for England stratified according to  
55  
56 levels of area-deprivation [10]. An evaluation of the Go Well regeneration programme, based  
57  
58  
59  
60

1  
2 in Glasgow reported a small improvement in mental health was associated with housing  
3 repairs and improvements, but no difference in mental health between residents living in  
4 intervention areas being demolished compared to residents from matched control areas [11].  
5  
6  
7  
8  
9

10  
11  
12 ‘Communities First’ is a Welsh Assembly Government programme of area-wide regeneration  
13 delivered in the most deprived communities in Wales. Communities First has spent around  
14 £300 million up until 2012 (equivalent to an average of some £200,000 per community or  
15 around £55 per resident per annum).[12] To date, evaluations of Communities First have  
16 included two reports based on process data which suggested the scheme was viewed  
17 positively by residents and may have had a beneficial effect on physical health [13, 14]; and  
18 another evaluation of the Communities First Support Network made recommendations on  
19 how best to support the Communities First programmes [15]. A comparison across Wales  
20 between residents who did and did not live in a Communities First area using routine  
21 government data aggregated at a small area level suggested there was very little impact on  
22 levels of unemployment, unemployment benefit, educational achievement, and crime. There  
23 was, however, no evaluation of Communities First on mental health [14].  
24  
25  
26  
27  
28  
29  
30  
31  
32  
33  
34  
35  
36  
37  
38  
39  
40  
41

42 The proposed study exploits an opportunity to nest a prospective controlled quasi-  
43 experimental study to investigate the effects of Communities First within an electronic  
44 record-linked prospective cohort, the Caerphilly Health & Social Needs Electronic Cohort  
45 Study (eCATALYsT) [16]. We will collect information on the type, location and costs of  
46 Communities First interventions in Caerphilly which will be anonymously record-linked to  
47 eCATALYsT study. The eCATALYsT study collected data on mental health, social cohesion  
48 before and after the Communities First programme, from residents who did and did not reside  
49 in Communities First areas, as well as providing detailed assessments on changes in  
50  
51  
52  
53  
54  
55  
56  
57  
58  
59  
60

1 household and individual-level socioeconomic status. We will also collect mental health data  
2  
3  
4 from general practice to triangulate results derived from cohort and routine data.  
5  
6  
7

### 8 **Aims and objectives:**

9  
10 This study will examine the association between residence in a Communities First area and  
11  
12 changes in mental health and social cohesion in a prospective controlled quasi-experimental,  
13  
14 or 'natural experiment' design, set in a general adult population sample. Our primary objective  
15  
16 is to determine:  
17

- 18 1. What is the impact of the *Communities First* regeneration programme on mental  
19  
20 health?  
21  
22  
23  
24

25 The interventions delivered as part of Communities First may also have an effect on levels of  
26  
27 social cohesion. This association could occur through the positive individual and community  
28  
29 effects of interventions on local friendship ties, collective attachment and rates of social  
30  
31 participation [17]. It is also clear that selective population migration needs to be taken into  
32  
33 account in any examination of health inequalities over time [18, 19], and that the costs and  
34  
35 benefits of interventions need to be assessed. Our secondary objectives therefore are to  
36  
37 determine:  
38  
39

- 40 1. What is the impact of the *Communities First* regeneration programme on social  
41  
42 cohesion?  
43  
44
- 45 2. To what extent does regeneration of a community result in population replacement  
46  
47 rather than regeneration?  
48  
49
- 50 3. What is the impact of the Communities First programme on area-level inequalities in  
51  
52 mental health and well-being, taking population migration into account?  
53  
54
- 55 4. To what extent can the benefits of the *Communities First* programme be considered to  
56  
57 represent value for money?  
58  
59  
60



## Methods and analysis

### Study design

The study will utilise intervention data and the eCATALyST study to create a prospective controlled quasi-experimental study - a 'natural experiment' [20].

### Setting

The study will be set in Caerphilly county borough, Wales, UK. Caerphilly borough has a population of around 178,000 with a large variation in levels of deprivation [21].

Communities First intervention areas account for roughly one-third of the Lower Super Output Areas (LSOAs) in Caerphilly and one-quarter of the resident population.

### Participants

Data have been collected from 4426 participants aged 18 to 74 years on 31 May 2001 who responded to both the 2001 and 2008 waves of the Caerphilly Health and Social Needs Electronic cohort study [16]. The prospective controlled quasi-experimental study involves a comparison of the 1,773 (40%) participants living in 47 LSOAs that received Communities First interventions between the two waves of data collection, with 2,653 subjects living in 63 LSOAs that did not receive any interventions (control areas; see figure 1).

### Use of existing record-linked datasets: the Secure Anonymous Information Linkage

#### Databank

The Secure Anonymous Information Linkage (SAIL) databank held within the Health Information Research Unit (HIRU) at Swansea University contains health, social and education data on three million residents of Wales, UK, and currently includes thirteen

1 datasets containing nearly one billion records [22, 23]. Information governance for SAIL is  
2  
3  
4 overseen by an Information Governance Review Panel [22]. The smallest geographical area  
5  
6 for which data are already linked and may be released from the databank, after scrutiny for  
7  
8 small numbers, is the 2001 Census LSOA.  
9

10  
11  
12  
13  
14 The Welsh Demographic Service (WDS) dataset held by NHS Wales Informatics Service  
15  
16 (NWIS), the NHS organisation in Wales mandated to hold personally identifiable data,  
17  
18 contains addresses for all individuals who register with a general practitioner. Dates for each  
19  
20 address record update are held, thereby providing durations of residency for several different  
21  
22 homes and the ability to link to local environment exposures at each. This dataset will be  
23  
24 used to track population migration and record length of exposure in a Communities First area.  
25  
26 The WDS contains address information linked anonymously at the individual level (the  
27  
28 anonymised linking field, ALF) which is the primary key variable for record-linkage. Using a  
29  
30 split-file technique, NWIS supplies ALFs for the whole population of Wales to the SAIL  
31  
32 databank [22, 23].  
33  
34  
35  
36  
37  
38  
39

#### 40 **Communities First Intervention data**

41  
42  
43 We will extract detailed data on each regeneration activity, including a text description,  
44  
45 geographical location, duration, and investment (£) using information held by Caerphilly  
46  
47 county borough council. We propose to classify the interventions delivered as part of  
48  
49 Communities First into seven domains of regeneration, informed by a scheme used to  
50  
51 organise projects funded by the New Deal for Communities [4]. Examples are provided  
52  
53 below.  
54  
55  
56  
57  
58  
59  
60

- 1  
2  
3  
4  
5  
6  
7  
8  
9  
10  
11  
12  
13  
14  
15  
16  
17  
18  
19  
20  
21  
22  
23  
24  
25  
26  
27  
28  
29  
30  
31  
32  
33  
34  
35  
36  
37  
38  
39  
40  
41  
42  
43  
44  
45  
46  
47  
48  
49  
50  
51  
52  
53  
54  
55  
56  
57  
58  
59  
60
1. *Crime*. Reducing crime and the fear of crime through installing CCTV, street lighting and alarms;
2. *Education*. Providing educational support through after school/breakfast/holiday clubs, early learning and Sure Start;
3. *Health*. Projects to improve the health of residents directly through provision of sport equipment, staffing of sports clubs, health improvement interventions such as healthy eating projects;
4. *Housing and the physical environment*. Housing maintenance and repairs, environmental improvement such as redevelopment of waste land, maintenance of green space, parks, building of play grounds; building and maintenance of roads and cycle paths;
5. *Employment*. Improving employment prospects included providing advice to businesses; projects to develop of computer skills of the unemployed;
6. *Community*. Increasing social contact and participation including the building of community facilities, staffing of youth projects, funding of luncheon and widows clubs and community events;
7. *Infrastructure*. Spending on the running of the partnerships. This entailed spending on staff, stationary, and training.

The classification scheme may be amended following extraction of all information on interventions.

### **The Caerphilly Health and Social Needs Electronic Cohort (eCATALyST)**

The Caerphilly Health & Social Needs Electronic Cohort (eCATALyST) is a prospective cohort study residents of Caerphilly county borough, Wales, United Kingdom. The study has been described in detail elsewhere [16]. Briefly, in 2001 a stratified random sample of 22,236 individuals aged 18 and over resulted in 10,892 respondents providing valid information on

1 mental health. In 2008 the survey was repeated with 9,551 participants who still resided in  
2 the borough. Of these, 4,798 returned questionnaires, with 4,426 providing data on their  
3 mental health at both waves. The study has detailed information on a wide range of social,  
4 demographic, and economic risk factors (e.g. age, gender, socioeconomic status, educational  
5 achievement, employment, household income, council tax band) health and lifestyle outcome  
6 data (e.g. cardiovascular risk factors, SF-36v2 for the Mental Health Inventory scale [24],  
7 limiting long-term illness), and perceptions of neighbourhood, including the Buckner  
8 Neighbourhood Cohesion scale [25].  
9  
10  
11  
12  
13  
14  
15  
16  
17  
18  
19  
20  
21  
22

### 23 **Data from general practice on consultations and prescribing**

24  
25  
26 The SAIL databank currently contains data on consultations and prescribing data for around  
27 40% of the Welsh population. To date, data from nine of the 29 GP practices in Caerphilly  
28 borough are record-linked in SAIL. This data will be used to compare information on  
29 common mental disorders from the eCATALyST dataset to that defined using data from  
30 general practice. We have already defined a set of Read codes used by general practice to  
31 define a case of common mental disorder [26]. Although only around one-third of the survey  
32 dataset respondents will have linked GP data, this provides an opportunity to compare results  
33 for common mental disorders reported in the community survey to those that present to  
34 primary care.  
35  
36  
37  
38  
39  
40  
41  
42  
43  
44  
45  
46  
47  
48  
49

### 50 **Primary outcome: Mental health**

51  
52 Data on changes in mental health will be assessed using the 2001 and 2008 waves of  
53 eCATALyST. Mental health was assessed in 2001 and 2008 using the Mental Health  
54 Inventory (MHI-5) included in the SF-36 version 2 scale [27, 28]. The validity and reliability  
55  
56  
57  
58  
59  
60

1  
2 of the MHI-5 are well established [28] and the scores reflect the continuously distributed  
3  
4 nature of mental health status in the population [27, 28]. Respondents can achieve a total  
5  
6 score within a range of 5 to 25, which can be transformed to a 0 to 100 scale [29, 30]. The  
7  
8 primary outcome measure for the analysis is change in mental health score, wave 2 – wave 1,  
9  
10 so that positive values indicate an improvement in mental health.  
11  
12

13  
14  
15  
16 We will repeat our analysis using a set of Read codes used by general practice to represent  
17  
18 the common mental disorders. The specific set of codes will build on work conducted by our  
19  
20 group using data from general practice to define a common mental disorder [26]. They will  
21  
22 include codes for symptoms, diagnosis and treatments for psychiatric illnesses such as  
23  
24 anxiety disorders and major depression.  
25  
26  
27  
28  
29  
30

### 31 **Secondary outcome measures**

#### 32 *Social cohesion*

33  
34  
35  
36  
37 Social cohesion was measured in both waves of eCATALyST study using a modified version  
38  
39 of Buckner's Neighbourhood Cohesion Scale [23]. Social cohesion was measured using eight  
40  
41 items: 'I visit my friends in their homes', 'The friendships and associations I have with other  
42  
43 people in my neighbourhood mean a lot to me', 'If I need advice about something I could go  
44  
45 to someone in my neighbourhood', 'I believe my neighbours would help in an emergency', 'I  
46  
47 borrow things and exchange favours with my neighbours', 'I would be willing to work  
48  
49 together with others on something to improve my neighbourhood', 'I rarely have a neighbour  
50  
51 over to my house to visit' (reverse scored), and 'I regularly stop and talk with people in my  
52  
53 neighbourhood'. We will derive small-area social cohesion scores using our ecometric  
54  
55 methodology [31].  
56  
57  
58  
59  
60

### **Mental health inequalities**

The eCATALyST study includes the following measures of socio-economic position at both waves [16]: Registrar General Social Class and the National Statistics Socio-economic Classification (NS-SEC) [32]; housing tenure; council tax band of residence; full classification of employment status; and gross household income in two bands (above and below 60% of median income). Using the Welsh Index of Multiple Deprivation (WIMD) 2005 we will categorise each of the LSOAs into quintiles (based on four cut-points and equal counts of LSOAs) for aggregate analyses and use the WIMD score as a LSOA-level covariate in statistical models.

### **Sample size**

In this prospective controlled quasi-experimental study the sample size is fixed and so we can calculate the power available to detect a clinically important difference in our primary outcome measure of mental health, the Mental Health Inventory (MHI-5) scale scores between groups. Of the 4,426 eligible survey participants, 1,773 reside in 47 intervention LSOAs and 2,653 in 63 control LSOAs. Comparing changes in the MHI-5 score between those living in regeneration areas and those living in control areas would have a power of 87% for detecting a difference of 2 in the mean score, allowing for clustering at LSOA-level. This is high power to detect a small, but clinically important, numerical difference in scores.

### **Statistical analysis plan**

1  
2  
3  
4  
5  
6  
7  
8  
9  
10  
11  
12  
13  
14  
15  
16  
17  
18  
19  
20  
21  
22  
23  
24  
25  
26  
27  
28  
29  
30  
31  
32  
33  
34  
35  
36  
37  
38  
39  
40  
41  
42  
43  
44  
45  
46  
47  
48  
49  
50  
51  
52  
53  
54  
55  
56  
57  
58  
59  
60

The primary analysis will examine the association between changes in MHI-5 scores and residence in a Communities First intervention area or control area. Data on individuals nested within LSOAs will be available. Our analysis plan is:

1. Descriptive statistics for change in mental health, social cohesion and socioeconomic covariates 2001 to 2008, comparing residents of Communities First and control areas;
2. Multilevel linear models to examine changes in MHI-5 scores (2001 to 2008) and multilevel logistic models for the odds of a case of common mental disorder between residents of Communities First and control areas, adjusting for compositional characteristics including baseline age, gender and transitions in individual-level covariates recorded in eCATALyST. We will adjust for LSOA deprivation using quintiles of the 2005 Welsh Index of Multiple Deprivation (WIMD)[33]. We will then include interaction terms to examine whether the effect of Communities First varies according to individual and LSOA-level social cohesion. To investigate the different types of interventions, we will repeat models replacing the binary term for residence in a Communities First or control area with a categorical term for the different types of interventions.

In order to address the secondary research questions:

3. We will fit further multilevel linear models described above to examine changes in levels of social cohesion;
4. We will assess the effect of population migration by including a term in these models for whether a participant has moved (yes/no) and whether that move was out of, or into, another Communities First LSOA. We will also compare a model, in which respondents are assumed not to have moved, with a model in which the correct migration is coded, following published methods[19].

- 1  
2  
3  
4  
5  
6  
7  
8  
9  
10  
11  
12  
13  
14  
15  
16  
17  
18  
19  
20  
21  
22  
23  
24  
25  
26  
27  
28  
29  
30  
31  
32  
33  
34  
35  
36  
37  
38  
39  
40  
41  
42  
43  
44  
45  
46  
47  
48  
49  
50  
51  
52  
53  
54  
55  
56  
57  
58  
59  
60
5. We will examine the effect of Communities First on mental health inequalities by modelling interactions between residence in a Communities First area and (i) baseline area deprivation Welsh Index of Multiple Deprivation (WIMD) 2005 scores [33] and, (ii) population sub-groups (e.g. gender, employment status);
6. A cost consequences analysis will be conducted and post-trial modelling employed to assess the cost consequences over longer time horizons than is possible within the study period. Changes in resources utilised over time in the Communities First areas relative to the control areas will be calculated and used in conjunction with the costs of setting up and delivering Communities First to generate the net cost of programme delivery per family; this will represent the incremental cost of providing the programme relative to usual service provision. The differences in primary, secondary and tertiary outcomes (including differences in utility scores derived from the SF-36 responses at each follow-up) will be used alongside the net cost of programme delivery to generate a set of indicators of relative cost-effectiveness within the study period, based on incremental cost and incremental outcomes [34]. These will be used to provide indicators of the extent to which the programme can be viewed as representing value for money.

We plan to conduct a number of sensitivity analyses to examine: 1) duration of exposure to Communities First by repeating models with length of residence rather than a binary term for exposure; and, 2) contamination using definitions of each type of intervention according to their likelihood for contamination. We will also explore analysis using propensity scores in an attempt to promote balance across intervention and control areas. We will write these models in MLWiN [35], Stata [36], or R [37].

### **Ethics and dissemination**



1  
2  
3  
4  
5  
6  
7  
8  
9  
10  
11  
12  
13  
14  
15  
16  
17  
18  
19  
20  
21  
22  
23  
24  
25  
26  
27  
28  
29  
30  
31  
32  
33  
34  
35  
36  
37  
38  
39  
40  
41  
42  
43  
44  
45  
46  
47  
48  
49  
50  
51  
52  
53  
54  
55  
56  
57  
58  
59  
60

The study has been approved by the Information Governance Review Panel (IGRP) at Swansea University (Ref: 0266 CF) to link the Communities First intervention data to outcome data from the eCATALyST study, general practice records, as well as the WDS within SAIL. The IGRP reviews all applications to the SAIL databank and members include senior representatives from the British Medical Association (BMA), the National Research Ethics Service (NRES), Public Health Wales, NHS Wales Informatics Service (NWIS), and Involving People. NRES does not consider that studies using only anonymised data require its approval. The eCATALyST study received ethical approval for the baseline survey 2001 from the former Gwent Local Research Ethics Committee (REF: JW/CC/00/59(a)) and for the wave 2 survey in 2008, approved by the SE Wales Research Ethics Committee Panel C (ref 08/WSE03/25).

Findings will be disseminated through standard academic pathways including peer-review publications, presentations at national and international conferences, and updates on our study website (<http://medicine.cardiff.ac.uk/clinical-study/communities-first-regeneration-programme/>). In addition, we will present our findings to policy partners in Caerphilly county borough, Public Health Wales, the Welsh Government, as well as the partnership boards who currently deliver Communities First.

## Discussion

The proposed study is highly policy relevant. The Marmot Review of Health Inequalities has the creation of, “locally developed and evidence-based community regeneration programmes” as an objective to improve health and reduce health inequalities by 2020 [38]. This study exploits an opportunity to construct a natural experiment to evaluate the impact of a multi-million pound national regeneration programme on mental health. We will extract data on the location and type of interventions and nest it within an anonymously record-

1 linked prospective cohort (eCATALyST) so that we will have detailed assessments on  
2  
3 individual and household-level social, economic and health-based confounding factors which  
4  
5 have been linked with changes in mental health. These detailed assessments are not  
6  
7 commonly available in routine data sources which are typically used in prospective controlled  
8  
9 quasi-experimental studies [20, 39]. These individual-level confounding factors will be  
10  
11 important in our planned analysis in the attempt to separate out the effects of Communities  
12  
13 First, delivered on the basis of residence in a deprived area, from that area and individual-  
14  
15 level socioeconomic disadvantage. Through linkage to routine data we can also examine  
16  
17 effects on common mental disorders that present in primary care and provide a more sensitive  
18  
19 assessment of exposure to the interventions funded by Communities First through  
20  
21 information on length of residence in a Communities First area provided by the WDS.  
22  
23  
24  
25  
26  
27  
28  
29  
30  
31  
32  
33  
34  
35  
36  
37  
38  
39  
40  
41  
42  
43  
44  
45  
46  
47  
48  
49  
50  
51  
52  
53  
54  
55  
56  
57  
58  
59  
60

1  
2  
3  
4  
5  
6  
7  
8  
9  
10  
11  
12  
13  
14  
15  
16  
17  
18  
19  
20  
21  
22  
23  
24  
25  
26  
27  
28  
29  
30  
31  
32  
33  
34  
35  
36  
37  
38  
39  
40  
41  
42  
43  
44  
45  
46  
47  
48  
49  
50  
51  
52  
53  
54  
55  
56  
57  
58  
59  
60

Figure 1: The 47 Communities First intervention LSOAs and 63 control LSOAs in Caerphilly County Borough (Wales, UK).

For peer review only

## Competing interests

The author(s) declare that they have no competing interests.

## Acknowledgements

This project is funded by the National Institute for Social Care and Health Research (NISCHR) programme (project reference RFS-12-05). We should like to thank the participants of the eCATALyST studies and many of the staff of Gwent Health Authority, the Caerphilly Local Health Group the Chief Executive's Office and the Electoral Services Department of Caerphilly county borough council for their help. This study makes use of anonymised data held in the Secure Anonymised Information Linkage (SAIL) system, which is part of the national e-health records research infrastructure for Wales. We would like to acknowledge all the data providers who make anonymised data available for research.

This work is undertaken with the support of The Centre for the Development and Evaluation of Complex Interventions for Public Health Improvement (DECIPHer), a UKCRC Public Health Research Centre of Excellence. Joint funding (MR/KO232331/1) from the British Heart Foundation, Cancer Research UK, Economic and Social Research Council, Medical Research Council, the Welsh Government and the Wellcome Trust, under the auspices of the UK Clinical Research Collaboration, is gratefully acknowledged. This work is also supported by the Farr Institute of Health Informatics Research. The Farr Institute is supported by a consortium of ten UK research organisations: Arthritis Research UK, the British Heart Foundation, Cancer Research UK, the Economic and Social Research Council, the Engineering and Physical Sciences Research Council, the Medical Research Council, the National Institute of Health Research, the National Institute for Social Care and Health Research (Welsh Government) and the Chief Scientist Office (Scottish Government Health Directorates).

### Authors' contributions

All authors made a substantial contribution to the design of the study. JW is principal investigator. DF is the principal investigator on the eCATALyST study. GG, JW, and DF critically appraised the research papers. CW, DF, SP and EE designed the methods classifying interventions funded by Communities First. FD, SR and DF designed the statistical analysis. RAL, AJ and SR led the use of SAIL methodology. IH and CP designed the cost-effectiveness analysis. JW and GG wrote the manuscript and all authors contributed to critical revision of the final version. All authors read and approved the final manuscript and the decision to submit the manuscript for publication.

## References

- 1 Thomson H, Atkinson R, Petticrew M, *et al*. Do urban regeneration programmes improve public health and reduce health inequalities? A synthesis of the evidence from UK policy and practice (1980–2004). *Journal of Epidemiology and Community Health* 2006;**60**:108–115. doi:10.1136/jech.2005.038885
- 2 Egan M, Kearns A, Mason P, *et al*. Protocol for a mixed methods study investigating the impact of investment in housing, regeneration and neighbourhood renewal on the health and wellbeing of residents: the GoWell programme. *BMC medical research methodology* 2010;**10**:41.
- 3 Rodgers SE, Heaven M, Lacey A, *et al*. Cohort Profile: The Housing Regeneration and Health Study. *Int J Epidemiol* 2014;**43**:52–60. doi:10.1093/ije/dys200
- 4 Gutiérrez Romero R. Estimating the impact of England’s area-based intervention ‘New Deal for Communities’ on employment. *Regional Science and Urban Economics* 2009;**39**:323–31.
- 5 Thomson H, Thomas S, Sellstrom E, *et al*. The health impacts of housing improvement: a systematic review of intervention studies from 1887 to 2007. *American journal of public health* 2009;**99**:S681.
- 6 Thomson H, Petticrew M, Morrison D. Health effects of housing improvement: systematic review of intervention studies. *BMJ* 2001;**323**:187–90.
- 7 Batty E. Addressing Educational Disadvantage in Deprived Communities: Evidence from the New Deal for Communities Programme in England. *Urban Stud* 2012;:0042098012465129. doi:10.1177/0042098012465129
- 8 Belsky J, Melhuish EC, Barnes J. *The national evaluation of Sure Start: does area-based early intervention work?* Policy Press 2007.  
[http://books.google.com/books?hl=en&lr=&id=hL8rZuMN3SMC&oi=fnd&pg=PR5&dq=The+national+evaluation+of+Sure+Start:+does+area-based+early+intervention+work%3F&ots=E3W1IZiGWP&sig=HgyHJvBNuLWZektCuN\\_HKL1i97E](http://books.google.com/books?hl=en&lr=&id=hL8rZuMN3SMC&oi=fnd&pg=PR5&dq=The+national+evaluation+of+Sure+Start:+does+area-based+early+intervention+work%3F&ots=E3W1IZiGWP&sig=HgyHJvBNuLWZektCuN_HKL1i97E) (accessed 11 Aug2014).
- 9 Stafford M, Nazroo J, Popay JM, *et al*. Tackling inequalities in health: evaluating the New Deal for Communities initiative. *J Epidemiol Community Health* 2008;**62**:298–304. doi:10.1136/jech.2006.058628
- 10 Stafford M, Badland H, Nazroo J, *et al*. Evaluating the health inequalities impact of area-based initiatives across the socioeconomic spectrum: a controlled intervention study of the New Deal for Communities, 2002–2008. *Journal of epidemiology and community health* 2014;:jech-2014.
- 11 Egan M, Katikireddi SV, Kearns A, *et al*. Health effects of neighborhood demolition and housing improvement: a prospective controlled study of 2 natural experiments in urban renewal. *Am J Public Health* 2013;**103**:e47–53. doi:10.2105/AJPH.2013.301275
- 12 Government Social Research. The Evaluation of Communities First. 2011.  
<http://wales.gov.uk/docs/dsjlg/publications/comm/110913evalreporten.pdf>

- 1  
2  
3  
4  
5  
6  
7  
8  
9  
10  
11  
12  
13  
14  
15  
16  
17  
18  
19  
20  
21  
22  
23  
24  
25  
26  
27  
28  
29  
30  
31  
32  
33  
34  
35  
36  
37  
38  
39  
40  
41  
42  
43  
44  
45  
46  
47  
48  
49  
50  
51  
52  
53  
54  
55  
56  
57  
58  
59  
60
- 13 Welsh Assembly Government. Interim evaluation of Communities First. 2006.  
<http://wales.gov.uk/dsjlg/research/c1stinterim/reporte.pdf?lang=en>
  - 14 Welsh Government. Evaluation of Communities First. 2011.  
<http://wales.gov.uk/docs/caecd/research/110913-evaluation-communities-first-en.pdf>
  - 15 Welsh Assembly Government. Evaluation of the Communities First Support Network.  
2007. <http://wales.gov.uk/dsjlg/research/cfsupportnetwork/finalreport.pdf?lang=en>
  - 16 Fone DL, Dunstan F, White J, *et al.* Cohort Profile: The Caerphilly Health and Social  
Needs Electronic Cohort Study (E-CATALyST). *Int J Epidemiol* Published Online First:  
5 November 2012. doi:10.1093/ije/dys175
  - 17 Oishi S, Rothman AJ, Snyder M, *et al.* The socioecological model of procommunity  
action: the benefits of residential stability. *J Pers Soc Psychol* 2007;**93**:831–44.  
doi:10.1037/0022-3514.93.5.831
  - 18 Connolly S, O'Reilly D, Rosato M. Increasing inequalities in health: Is it an artefact  
caused by the selective movement of people? *Social science & medicine* 2007;**64**:2008–  
15.
  - 19 Norman P, Boyle P, Rees P. Selective migration, health and deprivation: a longitudinal  
analysis. *Social Science & Medicine* 2005;**60**:2755–71.
  - 20 Craig P, Cooper C, Gunnell D, *et al.* Using natural experiments to evaluate population  
health interventions: new Medical Research Council guidance. *Journal of epidemiology  
and community health* Published Online First: 10 May 2012. doi:10.1136/jech-2011-  
200375
  - 21 Office for National Statistics. 2011 Census. Office for National Statistics.  
2012. <http://www.ons.gov.uk/ons/rel/census/2011-census/population-and-household-estimates-for-wards-and-output-areas-in-england-and-wales/index.html> (accessed 11  
Aug2014).
  - 22 Ford D, Jones K, Verplancke JP, *et al.* The SAIL Databank: building a national  
architecture for e-health research and evaluation. *BMC health services research*  
2009;**9**:157.
  - 23 Lyons R, Jones K, John G, *et al.* The SAIL databank: linking multiple health and social  
care datasets. *BMC medical informatics and decision making* 2009;**9**:3.
  - 24 Ware JE, Kosinski M, Dewey JE, *et al.* *SF-36 health survey: manual and interpretation  
guide*. Quality Metric Inc. 2000.
  - 25 Buckner JC. The development of an instrument to measure neighborhood cohesion.  
*American Journal of Community Psychology* 1988;**16**:771–91.
  - 26 Fone DL, Dunstan F, John A, *et al.* Associations between common mental disorders and  
the Mental Illness Needs Index in community settings Multilevel analysis. *BJP*  
2007;**191**:158–63. doi:10.1192/bjp.bp.106.027458
  - 27 Ware JE, Kosinski M, Dewey JE. How to Score Version Two of the SF-36 Health  
Survey. *Lincoln, RI: QualityMetric* 2000.

- 1  
2  
3  
4  
5  
6  
7  
8  
9  
10  
11  
12  
13  
14  
15  
16  
17  
18  
19  
20  
21  
22  
23  
24  
25  
26  
27  
28  
29  
30  
31  
32  
33  
34  
35  
36  
37  
38  
39  
40  
41  
42  
43  
44  
45  
46  
47  
48  
49  
50  
51  
52  
53  
54  
55  
56  
57  
58  
59  
60
- 28 Ware Jr JE, Gandek B. Overview of the SF-36 health survey and the international quality of life assessment (IQOLA) project. *Journal of clinical epidemiology* 1998;**51**:903–12.
- 29 Kelly MJ, Dunstan FD, Lloyd K, *et al.* Evaluating cutpoints for the MHI-5 and MCS using the GHQ-12: A comparison of five different methods. *BMC Psychiatry* 2008;**8**:10.
- 30 Fone D, Greene G, Farewell D, *et al.* Common mental disorders, neighbourhood income inequality and income deprivation: small-area multilevel analysis. *BJP* 2013;**202**:286–93. doi:10.1192/bjp.bp.112.116178
- 31 Fone DL, Farewell DM, Dunstan FD. An ecometric analysis of neighbourhood cohesion. *Population Health Metrics* 2006;**4**:17.
- 32 Rose D, Pevalin DJ. *A researcher's guide to the national statistics socio-economic classification*. SAGE Publications Ltd 2003.
- 33 Welsh Assembly Government. Welsh Index of Multiple Deprivation 2005. Welsh Assembly Government 2005. <http://wales.gov.uk/docs/statistics/2005/051208wimd2005localrevised.en.pdf>
- 34 Drummond MF, Sculpher MJ, Torrance GW. *Methods for the economic evaluation of health care programmes*. Oxford University Press, USA 2005.
- 35 Rasbash J, Browne W, Goldstein H, *et al.* *A user's guide to MLwiN*. University of London, Institute of Education, Centre for Multilevel Modelling 2000. <ftp://212.147.58.166/install/favre/documents%20r%E9cup%E9r%E9s/Folder111/Master%20en%20Sp%E9cialis%E9/Statistiques%20III%20-%20IV,%20Studer/StatisticsIV/MLwiNUserGuide.pdf> (accessed 29 Apr2014).
- 36 Stata | Stata 13. <http://www.stata.com/stata13/> (accessed 11 Aug2014).
- 37 Team RdC. R: A language and environment for statistical computing. *R foundation for Statistical Computing* Published Online First: 2005. [http://r-project.kr/sites/default/files/2%EA%B0%95%EA%B0%95%EC%A2%8C%EC%86%8C%EA%B0%9C\\_%EC%8B%A0%EC%A2%85%ED%99%94.pdf](http://r-project.kr/sites/default/files/2%EA%B0%95%EA%B0%95%EC%A2%8C%EC%86%8C%EA%B0%9C_%EC%8B%A0%EC%A2%85%ED%99%94.pdf) (accessed 29 Apr2014).
- 38 Marmot MG, Allen J, Goldblatt P, *et al.* Fair society, healthy lives: Strategic review of health inequalities in England post-2010. Published Online First: 2010. <http://eprints.ucl.ac.uk/111743/> (accessed 2 Sep2014).
- 39 Lyons RA, Ford DV, Moore L, *et al.* Use of data linkage to measure the population health effect of non-health-care interventions. *The Lancet* 2014;**383**:1517–9.



**The Communities First (ComFi) study: protocol for a prospective controlled quasi-experimental study to evaluate the impact of area-wide regeneration on mental health and social cohesion in deprived communities**

Authors:

|                              |                            |
|------------------------------|----------------------------|
| James White <sup>1,2</sup>   | whitej11@cf.ac.uk          |
| Giles Greene <sup>1</sup>    | greeneg@cardiff.ac.uk      |
| Frank Dunstan <sup>3</sup>   | dunstanfd@cardiff.ac.uk    |
| Sarah Rodgers <sup>4</sup>   | s.e.rodgers@Swansea.ac.uk  |
| Ronan A Lyons <sup>4</sup>   | r.a.lyons@swansea.ac.uk    |
| Ioan Humphreys <sup>5</sup>  | i.humphreys@swansea.ac.uk  |
| Ann John <sup>4</sup>        | a.john@swansea.ac.uk       |
| Chris Webster <sup>6</sup>   | cwebster@hku.hk            |
| Stephen Palmer <sup>3</sup>  | palmersr@cardiff.ac.uk     |
| Eva Elliott <sup>7</sup>     | elliotte@cardiff.ac.uk     |
| Ceri J Phillips <sup>5</sup> | c.j.phillips@swansea.ac.uk |
| David Fone <sup>3</sup>      | foned@cardiff.ac.uk        |

<sup>1</sup> South East Wales Trials Unit (SEWTU), School of Medicine, 4th floor Neuadd Meirionnydd, Heath Park, Cardiff. CF14 4YS.

<sup>2</sup> Centre for the Development and Evaluation of Complex Interventions for Public Health Improvement (DECIPHer), School of Medicine, Heath Park, Cardiff. CF14 4YS.

<sup>3</sup> Institute of Primary Care & Public Health, Neuadd Meirionnydd, School of Medicine, Cardiff University, Heath Park, Cardiff. CF14 4YS.

<sup>4</sup> Farr Institute, College of Medicine, Swansea University, Swansea. SA2 8PP.

1  
2  
3  
4  
5  
6  
7  
8  
9  
10  
11  
12  
13  
14  
15  
16  
17  
18  
19  
20  
21  
22  
23  
24  
25  
26  
27  
28  
29  
30  
31  
32  
33  
34  
35  
36  
37  
38  
39  
40  
41  
42  
43  
44  
45  
46  
47  
48  
49  
50  
51  
52  
53  
54  
55  
56  
57  
58  
59  
60

<sup>5</sup> Swansea Centre for Health Economics, College of Human and Health Sciences, Swansea University, Singleton Park, Swansea. SA2 8PP.

<sup>6</sup> The University of Hong Kong, Faculty of Architecture, Department of Urban Planning and Design, Pokfulam, Hong Kong.

<sup>7</sup> Cardiff Institute of Society, Health and Wellbeing (CISHeW), School of Social Sciences, Cardiff University, 12 Museum Place, Cardiff. CF10 3BG.

Corresponding author: Dr James White

Telephone 02920 687243/ 875184, Fax 02920 687611

email: [whitej11@cf.ac.uk](mailto:whitej11@cf.ac.uk)

## Abstract

**Introduction:** Recent systematic reviews have highlighted the dearth of evidence on the effectiveness of regeneration on health and health inequalities. 'Communities First' is an area-wide regeneration scheme to improve the lives of people living in the most deprived areas in Wales (United Kingdom). This study will evaluate the impact of Communities First on residents' mental health and social cohesion.

**Methods and analysis:** A prospective controlled quasi-experimental study of the association between residence in Communities First regeneration areas in Caerphilly county borough and change in mental health and social cohesion. The study population is the 4226 residents aged 18-74 years who responded to the Caerphilly Health and Social Needs Study in 2001 (before delivery) and 2008 (after delivery of Communities First). Data on the location, type and cost of Communities First interventions will be extracted from records collected by Caerphilly county borough council. The primary outcome is the change in mental health between 2001 and 2008. Secondary outcomes are changes: in common mental disorder case status (using survey and gGeneral pPractice data), social cohesion and mental health inequalities.

Multilevel models will examine change in mental health and social cohesion between Communities First and control areas, adjusting for individual and household level confounding factors. Further models will examine the effects of (1) different types of intervention, (2) contamination across areas, (3) length of residence in a Communities First area, and (4) population migration. We will carry out a cost-consequences analysis to summarize the outcomes generated for participants, as well as service utilization and utility gains.

**Ethics and dissemination:** This study has had approval from the Information Governance Review Panel at Swansea University (Ref: 0266 CF). Findings will be disseminated through peer-review publications, international conferences, policy and practice partners in local and

1 national government, and updates on our study website ([http://medicine.cardiff.ac.uk/clinical-](http://medicine.cardiff.ac.uk/clinical-study/communities-first-regeneration-programme/)  
2 [study/communities-first-regeneration-programme/](http://medicine.cardiff.ac.uk/clinical-study/communities-first-regeneration-programme/)).  
3  
4  
5  
6  
7  
8  
9

### 10 **Strengths and limitations of this study**

- 11  
12  
13 • The study is a prospective controlled evaluation of a natural experiment which has  
14 detailed mental health data from an anonymously record-linked prospective cohort  
15 (eCATALyST) and gGeneral pPractice such that we will have detailed assessments  
16  
17 on individual and household-level social, economic and health-based confounding  
18 factors.  
19  
20  
21  
22  
23
- 24 • The study is sufficiently powered to detect an effect of the Communities First  
25 programme on mental health, and the cost consequences of the intervention will be  
26 assessed.  
27  
28  
29  
30  
31  
32  
33

34 **Keywords:** Regeneration, Mental health, Social cohesion, Natural experiment, Data linkage,  
35  
36  
37 Multilevel analysis  
38  
39  
40  
41  
42  
43  
44  
45  
46  
47  
48  
49  
50  
51  
52  
53  
54  
55  
56  
57  
58  
59  
60

## Introduction

1  
2  
3  
4  
5 Recently there has been political appetite for large scale programmes to address the wider  
6  
7 social, economic and environmental determinants of poor health through urban regeneration  
8  
9 and neighbourhood renewal projects. It is estimated that in the last 20 years over £11 billion  
10  
11 has been spent on these schemes in the United Kingdom [1]. These regeneration schemes are  
12  
13 typically designed to improve the likelihood of employment, education, and social support  
14  
15 within economically deprived communities, rather than to directly improve health. The  
16  
17 interventions delivered in these schemes therefore include a broad range of regeneration  
18  
19 activities to: 1) improve the built environment: increase access to public transport, create or  
20  
21 maintain green space, 2) improve housing quality: provide free loft insulation, double glazing  
22  
23 [2, 3], 3) reduce crime and promote safety: install street lighting, alarms, traffic calming and  
24  
25 pedestrian zones, 4) reduce environmental stressors such as litter and noise, and 5) promote  
26  
27 social support and contact between residents: by building or staffing youth clubs, providing  
28  
29 sports equipment; setting up luncheon or widows clubs [4]. Although there has been a  
30  
31 number of systematic reviews examining on the health impacts of housing improvement [5,  
32  
33 6], and a few evaluations area-regeneration schemes on short-term changes in employment,  
34  
35 education and income [7, 8], there is a dearth of evidence on the effectiveness of area-wide  
36  
37 regeneration schemes on health outcomes [1].  
38  
39  
40  
41  
42  
43  
44  
45

46 We identified three studies which have evaluated the impact of area-regeneration schemes on  
47  
48 mental health [9, 10]. An evaluation of the New Deal for Communities, delivered in deprived  
49  
50 areas in England, found no difference in the change in mental health scores (2002 to 2008)  
51  
52 between residents of New Deal areas and residents randomly sampled from non-contiguous  
53  
54 comparator areas [9]; or participants in the Health Survey for England stratified according to  
55  
56 levels of area-deprivation [10]. An evaluation of the Go Well regeneration programme, based  
57  
58  
59  
60

1 in Glasgow reported a small improvement in mental health was associated with housing  
2 repairs and improvements, but no difference in mental health between residents living in  
3 intervention areas being demolished compared to residents from matched control areas [11].  
4  
5  
6  
7  
8  
9

10  
11  
12 ‘Communities First’ is a Welsh Assembly Government programme of area-wide regeneration  
13 delivered in the most deprived communities in Wales. Communities First has spent around  
14 £300 million up until 2012 (equivalent to an average of some £200,000 per community or  
15 around £55 per resident per annum).[12] To date, evaluations of Communities First have  
16 included two reports based on process data which suggested the scheme was viewed  
17 positively by residents and may have had a beneficial effect on physical health [13, 14]; and  
18 another evaluation of the Communities First Support Network made recommendations on  
19 how best to support the Communities First programmes [15]. A comparison across Wales  
20 between residents who did and did not live in a Communities First area using routine  
21 government data aggregated at a small area level suggested there was very little impact on  
22 levels of unemployment, unemployment benefit, educational achievement, and crime. There  
23 was, however, no evaluation of Communities First on mental health [14].  
24  
25  
26  
27  
28  
29  
30  
31  
32  
33  
34  
35  
36  
37  
38  
39  
40  
41

42 The proposed study exploits an opportunity to nest a prospective controlled quasi-  
43 experimental study to investigate the effects of Communities First within an electronic  
44 record-linked prospective cohort, the Caerphilly Health & Social Needs Electronic Cohort  
45 Study (eCATALYsT) [16]. We will collect information on the type, location and costs of  
46 Communities First interventions in Caerphilly which will be anonymously record-linked to  
47 eCATALYsT study. The eCATALYsT study collected data on mental health, social cohesion  
48 before and after the Communities First programme, from residents who did and did not reside  
49 in Communities First areas, as well as providing detailed assessments on changes in  
50  
51  
52  
53  
54  
55  
56  
57  
58  
59  
60

1 household and individual-level socioeconomic status. We will also collect mental health data  
2  
3  
4 from **g**General **p**Practice to triangulate results derived from cohort and routine data.  
5  
6  
7

### 8 **Aims and objectives:**

9  
10 This study will examine the association between residence in a Communities First area and  
11 changes in mental health and social cohesion in a prospective controlled quasi-experimental,  
12 or 'natural experiment' design, set in a general adult population sample. Our primary objective  
13  
14  
15  
16  
17 is to determine:

- 18  
19  
20 1. What is the impact of the *Communities First* regeneration programme on mental  
21  
22 health?  
23  
24

25 The interventions delivered as part of Communities First may also have an effect on levels of  
26 social cohesion. This association could occur through the positive individual and community  
27 effects of interventions on local friendship ties, collective attachment and rates of social  
28 participation [17]. It is also clear that selective population migration needs to be taken into  
29  
30  
31  
32  
33  
34  
35  
36  
37  
38  
39  
40  
41  
42  
43  
44  
45  
46  
47  
48  
49  
50  
51  
52  
53  
54  
55  
56  
57  
58  
59  
60

- 41  
42  
43  
44  
45  
46  
47  
48  
49  
50  
51  
52  
53  
54  
55  
56  
57  
58  
59  
60
1. What is the impact of the *Communities First* regeneration programme on social  
cohesion?
2. To what extent does regeneration of a community result in population replacement  
rather than regeneration?
3. What is the impact of the Communities First programme on area-level inequalities in  
mental health and well-being, taking population migration into account?
4. To what extent can the benefits of the *Communities First* programme be considered to  
represent value for money?

## Methods and analysis

### Study design

The study will utilise intervention data and the eCATALyST study to create a prospective controlled quasi-experimental study - a 'natural experiment' [20].

### Setting

The study will be set in Caerphilly county borough, Wales, UK. Caerphilly borough has a population of around 178,000 with a large variation in levels of deprivation [21].

Communities First intervention areas account for roughly one-third of the Lower Super Output Areas (LSOAs) in Caerphilly and one-quarter of the resident population.

### Participants

Data have been collected from 4426 participants aged 18 to 74 years on 31 May 2001 who responded to both the 2001 and 2008 waves of the Caerphilly Health and Social Needs Electronic cohort study [16]. The prospective controlled quasi-experimental study involves a comparison of the 1,773 (40%) participants living in 47 LSOAs that received Communities First interventions between the two waves of data collection, with 2,653 subjects living in 63 LSOAs that did not receive any interventions (control areas; see figure 1).

### Use of existing record-linked datasets: the Secure Anonymous Information Linkage

#### Databank

The Secure Anonymous Information Linkage (SAIL) databank held within the Health Information Research Unit (HIRU) at Swansea University contains health, social and education data on three million residents of Wales, UK, and currently includes thirteen



1 datasets containing nearly one billion records [22, 23]. Information governance for SAIL is  
2  
3  
4 overseen by an Information Governance Review Panel [22]. The smallest geographical area  
5  
6 for which data are already linked and may be released from the databank, after scrutiny for  
7  
8 small numbers, is the 2001 Census LSOA.  
9

10  
11  
12  
13  
14 The Welsh Demographic Service (WDS) dataset held by NHS Wales Informatics Service  
15  
16 (NWIS), the NHS organisation in Wales mandated to hold personally identifiable data,  
17  
18 contains addresses for all individuals who register with a **g**General **p**Practitioner. Dates for  
19  
20 each address record update are held, thereby providing durations of residency for several  
21  
22 different homes and the ability to link to local environment exposures at each. This dataset  
23  
24 will be used to track population migration and record length of exposure in a Communities  
25  
26 First area. The WDS contains address information linked anonymously at the individual level  
27  
28 (the anonymised linking field, ALF) which is the primary key variable for record-linkage.  
29  
30 Using a split-file technique, NWIS supplies ALFs for the whole population of Wales to the  
31  
32 SAIL databank [22, 23].  
33  
34  
35  
36  
37  
38  
39

#### 40 **Communities First Intervention data**

41  
42  
43 We will extract detailed data on each regeneration activity, including a text description,  
44  
45 geographical location, duration, and investment (£) using information held by Caerphilly  
46  
47 county borough council. We propose to classify the interventions delivered as part of  
48  
49 Communities First into seven domains of regeneration, informed by a scheme used to  
50  
51 organise projects funded by the New Deal for Communities [4]. Examples are provided  
52  
53 below.  
54  
55  
56  
57  
58  
59  
60

- 1  
2  
3  
4  
5  
6  
7  
8  
9  
10  
11  
12  
13  
14  
15  
16  
17  
18  
19  
20  
21  
22  
23  
24  
25  
26  
27  
28  
29  
30  
31  
32  
33  
34  
35  
36  
37  
38  
39  
40  
41  
42  
43  
44  
45  
46  
47  
48  
49  
50  
51  
52  
53  
54  
55  
56  
57  
58  
59  
60
1. *Crime*. Reducing crime and the fear of crime through installing CCTV, street lighting and alarms;
2. *Education*. Providing educational support through after school/breakfast/holiday clubs, early learning and Sure Start;
3. *Health*. Projects to improve the health of residents directly through provision of sport equipment, staffing of sports clubs, health improvement interventions such as healthy eating projects;
4. *Housing and the physical environment*. Housing maintenance and repairs, environmental improvement such as redevelopment of waste land, maintenance of green space, parks, building of play grounds; building and maintenance of roads and cycle paths;
5. *Employment*. Improving employment prospects included providing advice to businesses; projects to develop of computer skills of the unemployed;
6. *Community*. Increasing social contact and participation including the building of community facilities, staffing of youth projects, funding of luncheon and widows clubs and community events;
7. *Infrastructure*. Spending on the running of the partnerships. This entailed spending on staff, stationary, and training.

The classification scheme may be amended following extraction of all information on interventions.

### **The Caerphilly Health and Social Needs Electronic Cohort (eCATALyST)**

The Caerphilly Health & Social Needs Electronic Cohort (eCATALyST) is a prospective cohort study residents of Caerphilly county borough, Wales, United Kingdom. The study has been described in detail elsewhere [16]. Briefly, in 2001 a stratified random sample of 22,236 individuals aged 18 and over resulted in 10,892 respondents providing valid information on

1  
2  
3  
4  
5  
6  
7  
8  
9  
10  
11  
12  
13  
14  
15  
16  
17  
18  
19  
20  
21  
22  
23  
24  
25  
26  
27  
28  
29  
30  
31  
32  
33  
34  
35  
36  
37  
38  
39  
40  
41  
42  
43  
44  
45  
46  
47  
48  
49  
50  
51  
52  
53  
54  
55  
56  
57  
58  
59  
60

mental health. In 2008 the survey was repeated with 9,551 participants who still resided in the borough. Of these, 4,798 returned questionnaires, with 4,426 providing data on their mental health at both waves. The study has detailed information on a wide range of social, demographic, and economic risk factors (e.g. age, gender, socioeconomic status, educational achievement, employment, household income, council tax band) health and lifestyle outcome data (e.g. cardiovascular risk factors, SF-36v2 for the Mental Health Inventory scale [24], limiting long-term illness), and perceptions of neighbourhood, including the Buckner Neighbourhood Cohesion scale [25].

### Data from **g**General **p**Practice on consultations and prescribing

The SAIL databank currently contains data on consultations and prescribing data for around 40% of the Welsh population. To date, data from nine of the 29 GP practices in Caerphilly borough are record-linked in SAIL. This data will be used to compare information on common mental disorders from the eCATALyST dataset to that defined using data from **g**General **p**Practice. We have already defined a set of Read codes used by general practice to define a case of common mental disorder [26]. Although only around one-third of the survey dataset respondents will have linked GP data, this provides an opportunity to compare results for common mental disorders reported in the community survey to those that present to primary care.

### Primary outcome: Mental health

Data on changes in mental health will be assessed using the 2001 and 2008 waves of eCATALyST. Mental health was assessed in 2001 and 2008 using the Mental Health Inventory (MHI-5) included in the SF-36 version 2 scale [27, 28]. The validity and reliability

1 of the MHI-5 are well established [28] and the scores reflect the continuously distributed  
2 nature of mental health status in the population [27, 28]. Respondents can achieve a total  
3 score within a range of 5 to 25, which can be transformed to a 0 to 100 scale [29, 30]. The  
4 primary outcome measure for the analysis is change in mental health score, wave 2 – wave 1,  
5 so that positive values indicate an improvement in mental health.  
6  
7  
8  
9  
10  
11  
12  
13

14  
15  
16 We will repeat our analysis using a set of Read codes used by general practice to represent  
17 the common mental disorders. The specific set of codes will build on work conducted by our  
18 group using data from **g**General **p**Practice to define a common mental disorder [26]. They  
19 will include codes for symptoms, diagnosis and treatments for psychiatric illnesses such as  
20 anxiety disorders and major depression.  
21  
22  
23  
24  
25  
26  
27  
28  
29  
30

### 31 **Secondary outcome measures**

#### 32 *Social cohesion*

33  
34  
35  
36  
37 Social cohesion was measured in both waves of eCATALyST study using a modified version  
38 of Buckner's Neighbourhood Cohesion Scale [23]. Social cohesion was measured using eight  
39 items: 'I visit my friends in their homes', 'The friendships and associations I have with other  
40 people in my neighbourhood mean a lot to me', 'If I need advice about something I could go  
41 to someone in my neighbourhood', 'I believe my neighbours would help in an emergency', 'I  
42 borrow things and exchange favours with my neighbours', 'I would be willing to work  
43 together with others on something to improve my neighbourhood', 'I rarely have a neighbour  
44 over to my house to visit' (reverse scored), and 'I regularly stop and talk with people in my  
45 neighbourhood'. We will derive small-area social cohesion scores using our ecometric  
46 methodology [31].  
47  
48  
49  
50  
51  
52  
53  
54  
55  
56  
57  
58  
59  
60

### **Mental health inequalities**

The eCATALyST study includes the following measures of socio-economic position at both waves [16]: Registrar General Social Class and the National Statistics Socio-economic Classification (NS-SEC) [32]; housing tenure; council tax band of residence; full classification of employment status; and gross household income in two bands (above and below 60% of median income). Using the Welsh Index of Multiple Deprivation (WIMD) 2005 we will categorise each of the LSOAs into quintiles (based on four cut-points and equal counts of LSOAs) for aggregate analyses and use the WIMD score as a LSOA-level covariate in statistical models.

### **Sample size**

In this prospective controlled quasi-experimental study the sample size is fixed and so we can calculate the power available to detect a clinically important difference in our primary outcome measure of mental health, the Mental Health Inventory (MHI-5) scale scores between groups. Of the 4,426 eligible survey participants, 1,773 reside in 47 intervention LSOAs and 2,653 in 63 control LSOAs. Comparing changes in the MHI-5 score between those living in regeneration areas and those living in control areas would have a power of 87% for detecting a difference of 2 in the mean score, allowing for clustering at LSOA-level. This is high power to detect a small, but clinically important, numerical difference in scores.

### **Statistical analysis plan**

1  
2 The primary analysis will examine the association between changes in MHI-5 scores and  
3  
4 residence in a Communities First intervention area or control area. Data on individuals nested  
5  
6 within LSOAs will be available. Our analysis plan is:  
7

- 8  
9 1. Descriptive statistics for change in mental health, social cohesion and socioeconomic  
10  
11 covariates 2001 to 2008, comparing residents of Communities First and control areas;  
12  
13
- 14 2. Multilevel linear models to examine changes in MHI-5 scores (2001 to 2008) and  
15  
16 multilevel logistic models for the odds of a case of common mental disorder between  
17  
18 residents of Communities First and control areas, adjusting for compositional  
19  
20 characteristics including baseline age, gender and transitions in individual-level  
21  
22 covariates recorded in eCATALyST. We will adjust for LSOA deprivation using  
23  
24 quintiles of the 2005 Welsh Index of Multiple Deprivation (WIMD)[33]. We will then  
25  
26 include interaction terms to examine whether the effect of Communities First varies  
27  
28 according to individual and LSOA-level social cohesion. To investigate the different  
29  
30 types of interventions, we will repeat models replacing the binary term for residence  
31  
32 in a Communities First or control area with a categorical term for the different types  
33  
34 of interventions.  
35  
36

37  
38  
39 In order to address the secondary research questions:  
40

- 41  
42 3. We will fit further multilevel linear models described above to examine changes in  
43  
44 levels of social cohesion;  
45
- 46  
47 4. We will assess the effect of population migration by including a term in these models  
48  
49 for whether a participant has moved (yes/no) and whether that move was out of, or  
50  
51 into, another Communities First LSOA. We will also compare a model, in which  
52  
53 respondents are assumed not to have moved, with a model in which the correct  
54  
55 migration is coded, following published methods[19].  
56  
57  
58  
59  
60

- 1  
2  
3  
4  
5  
6  
7  
8  
9  
10  
11  
12  
13  
14  
15  
16  
17  
18  
19  
20  
21  
22  
23  
24  
25  
26  
27  
28  
29  
30  
31  
32  
33  
34  
35  
36  
37  
38  
39  
40  
41  
42  
43  
44  
45  
46  
47  
48  
49  
50  
51  
52  
53  
54  
55  
56  
57  
58  
59  
60
5. We will examine the effect of Communities First on mental health inequalities by modelling interactions between residence in a Communities First area and (i) baseline area deprivation Welsh Index of Multiple Deprivation (WIMD) 2005 scores [33] and, (ii) population sub-groups (e.g. gender, employment status);
6. A cost consequences analysis will be conducted and post-trial modelling employed to assess the cost consequences over longer time horizons than is possible within the study period. Changes in resources utilised over time in the Communities First areas relative to the control areas will be calculated and used in conjunction with the costs of setting up and delivering Communities First to generate the net cost of programme delivery per family; this will represent the incremental cost of providing the programme relative to usual service provision. The differences in primary, secondary and tertiary outcomes (including differences in utility scores derived from the SF-36 responses at each follow-up) will be used alongside the net cost of programme delivery to generate a set of indicators of relative cost-effectiveness within the study period, based on incremental cost and incremental outcomes [34]. These will be used to provide indicators of the extent to which the programme can be viewed as representing value for money.

We plan to conduct a number of sensitivity analyses to examine: 1) duration of exposure to Communities First by repeating models with length of residence rather than a binary term for exposure; and, 2) contamination using definitions of each type of intervention according to their likelihood for contamination. We will also explore analysis using propensity scores in an attempt to promote balance across intervention and control areas. We will write these models in MLWiN [35], Stata [36], or R [37].

### **Ethics and dissemination**

1 The study has been approved by the Information Governance Review Panel (IGRP) at  
2 Swansea University (Ref: 0266 CF) to link the Communities First intervention data to  
3  
4 outcome data from the eCATALyST study, Ggeneral pPractice records, as well as the WDS  
5  
6 within SAIL. The IGRP reviews all applications to the SAIL databank and members include  
7  
8 senior representatives from the British Medical Association (BMA), the National Research  
9  
10 Ethics Service (NRES), Public Health Wales, NHS Wales Informatics Service (NWIS), and  
11  
12 Involving People. NRES does not consider that studies using only anonymised data require  
13  
14 its approval. The eCATALyST study received ethical approval for the baseline survey 2001  
15  
16 from the former Gwent Local Research Ethics Committee (REF: JW/CC/00/59(a)) and for  
17  
18 the wave 2 survey in 2008, approved by the SE Wales Research Ethics Committee Panel C  
19  
20 (ref 08/WSE03/25).  
21  
22  
23  
24

25  
26 Findings will be disseminated through standard academic pathways including peer-  
27  
28 review publications, presentations at national and international conferences, and updates on  
29  
30 our study website ([http://medicine.cardiff.ac.uk/clinical-study/communities-first-  
31  
32 regeneration-programme/](http://medicine.cardiff.ac.uk/clinical-study/communities-first-regeneration-programme/)). In addition, we will present our findings to policy partners in  
33  
34 Caerphilly county borough, Public Health Wales, the Welsh Government, as well as the  
35  
36 partnership boards who currently deliver Communities First.  
37  
38  
39  
40  
41

## 42 Discussion

43  
44  
45 The proposed study is highly policy relevant. The Marmot Review of Health Inequalities has  
46  
47 the creation of, “locally developed and evidence-based community regeneration  
48  
49 programmes” as an objective to improve health and reduce health inequalities by 2020 [38].  
50  
51 This study exploits an opportunity to construct a natural experiment to evaluate the impact of  
52  
53 a multi-million pound national regeneration programme on mental health. We will extract  
54  
55 data on the location and type of interventions and nest it within an anonymously record-  
56  
57  
58  
59  
60



1 linked prospective cohort (eCATALyST) so that we will have detailed assessments on  
2 individual and household-level social, economic and health-based confounding factors which  
3  
4 individual and household-level social, economic and health-based confounding factors which  
5  
6 have been linked with changes in mental health. These detailed assessments are not  
7  
8 commonly available in routine data sources which are typically used in prospective controlled  
9  
10 quasi-experimental studies [20, 39]. These individual-level confounding factors will be  
11  
12 important in our planned analysis in the attempt to separate out the effects of Communities  
13  
14 First, delivered on the basis of residence in a deprived area, from that area and individual-  
15  
16 level socioeconomic disadvantage. Through linkage to routine data we can also examine  
17  
18 effects on common mental disorders that present in primary care and provide a more sensitive  
19  
20 assessment of exposure to the interventions funded by Communities First through  
21  
22 information on length of residence in a Communities First area provided by the WDS.  
23  
24  
25  
26  
27  
28  
29  
30  
31  
32  
33  
34  
35  
36  
37  
38  
39  
40  
41  
42  
43  
44  
45  
46  
47  
48  
49  
50  
51  
52  
53  
54  
55  
56  
57  
58  
59  
60

## Competing interests

The author(s) declare that they have no competing interests.

## Acknowledgements

This project is funded by the National Institute for Social Care and Health Research (NISCHR) programme (project reference RFS-12-05). We should like to thank the participants of the eCATALyST studies and many of the staff of Gwent Health Authority, the Caerphilly Local Health Group the Chief Executive's Office and the Electoral Services Department of Caerphilly county borough council for their help. This study makes use of anonymised data held in the Secure Anonymised Information Linkage (SAIL) system, which is part of the national e-health records research infrastructure for Wales. We would like to acknowledge all the data providers who make anonymised data available for research.

This work ~~was~~ is undertaken with the support of The Centre for the Development and Evaluation of Complex Interventions for Public Health Improvement (DECIPHer), a UKCRC Public Health Research Centre of Excellence. Joint funding (MR/KO232331/1) from the British Heart Foundation, Cancer Research UK, Economic and Social Research Council, Medical Research Council, the Welsh Government and the Wellcome Trust, under the auspices of the UK Clinical Research Collaboration, is gratefully acknowledged. This work ~~was~~ is also supported by the Farr Institute of Health Informatics Research. The Farr Institute is supported by a consortium of ten UK research organisations: Arthritis Research UK, the British Heart Foundation, Cancer Research UK, the Economic and Social Research Council, the Engineering and Physical Sciences Research Council, the Medical Research Council, the National Institute of Health Research, the National Institute for Social Care and Health Research (Welsh Government) and the Chief Scientist Office (Scottish Government Health Directorates).

1  
2  
3  
4  
5  
6  
7  
8  
9  
10  
11  
12  
13  
14  
15  
16  
17  
18  
19  
20  
21  
22  
23  
24  
25  
26  
27  
28  
29  
30  
31  
32  
33  
34  
35  
36  
37  
38  
39  
40  
41  
42  
43  
44  
45  
46  
47  
48  
49  
50  
51  
52  
53  
54  
55  
56  
57  
58  
59  
60

Figure 1: The 47 Communities First intervention LSOAs and 63 control LSOAs in Caerphilly County Borough (Wales, UK).

For peer review only

**Authors' contributions**

All authors made a substantial contribution to the design of the study. JW is principal investigator. DF is the principal investigator on the eCATALyST study. GG, JW, and DF critically appraised the research papers. CW, DF, SP and EE designed the methods classifying interventions funded by Communities First. FD, SR and DF designed the statistical analysis. RAL, AJ and SR led the use of SAIL methodology. IH and CP designed the cost-effectiveness analysis. JW and GG wrote the manuscript and all authors contributed to critical revision of the final version. All authors read and approved the final manuscript and the decision to submit the manuscript for publication.

## References

- 1 Thomson H, Atkinson R, Petticrew M, *et al*. Do urban regeneration programmes improve public health and reduce health inequalities? A synthesis of the evidence from UK policy and practice (1980–2004). *Journal of Epidemiology and Community Health* 2006;**60**:108–115. doi:10.1136/jech.2005.038885
- 2 Egan M, Kearns A, Mason P, *et al*. Protocol for a mixed methods study investigating the impact of investment in housing, regeneration and neighbourhood renewal on the health and wellbeing of residents: the GoWell programme. *BMC medical research methodology* 2010;**10**:41.
- 3 Rodgers SE, Heaven M, Lacey A, *et al*. Cohort Profile: The Housing Regeneration and Health Study. *Int J Epidemiol* 2014;**43**:52–60. doi:10.1093/ije/dys200
- 4 Gutiérrez Romero R. Estimating the impact of England’s area-based intervention ‘New Deal for Communities’ on employment. *Regional Science and Urban Economics* 2009;**39**:323–31.
- 5 Thomson H, Thomas S, Sellstrom E, *et al*. The health impacts of housing improvement: a systematic review of intervention studies from 1887 to 2007. *American journal of public health* 2009;**99**:S681.
- 6 Thomson H, Petticrew M, Morrison D. Health effects of housing improvement: systematic review of intervention studies. *BMJ* 2001;**323**:187–90.
- 7 Batty E. Addressing Educational Disadvantage in Deprived Communities: Evidence from the New Deal for Communities Programme in England. *Urban Stud* 2012;:0042098012465129. doi:10.1177/0042098012465129
- 8 Belsky J, Melhuish EC, Barnes J. *The national evaluation of Sure Start: does area-based early intervention work?* Policy Press 2007.  
[http://books.google.com/books?hl=en&lr=&id=hL8rZuMN3SMC&oi=fnd&pg=PR5&dq=The+national+evaluation+of+Sure+Start:+does+area-based+early+intervention+work%3F&ots=E3W1IZiGWP&sig=HgyHJvBNuLWZektCuN\\_HKL1i97E](http://books.google.com/books?hl=en&lr=&id=hL8rZuMN3SMC&oi=fnd&pg=PR5&dq=The+national+evaluation+of+Sure+Start:+does+area-based+early+intervention+work%3F&ots=E3W1IZiGWP&sig=HgyHJvBNuLWZektCuN_HKL1i97E) (accessed 11 Aug2014).
- 9 Stafford M, Nazroo J, Popay JM, *et al*. Tackling inequalities in health: evaluating the New Deal for Communities initiative. *J Epidemiol Community Health* 2008;**62**:298–304. doi:10.1136/jech.2006.058628
- 10 Stafford M, Badland H, Nazroo J, *et al*. Evaluating the health inequalities impact of area-based initiatives across the socioeconomic spectrum: a controlled intervention study of the New Deal for Communities, 2002–2008. *Journal of epidemiology and community health* 2014;:jech-2014.
- 11 Egan M, Katikireddi SV, Kearns A, *et al*. Health effects of neighborhood demolition and housing improvement: a prospective controlled study of 2 natural experiments in urban renewal. *Am J Public Health* 2013;**103**:e47–53. doi:10.2105/AJPH.2013.301275
- 12 Government Social Research. The Evaluation of Communities First. 2011.  
<http://wales.gov.uk/docs/dsjlg/publications/comm/110913evalreporten.pdf>

- 1  
2  
3  
4  
5  
6  
7  
8  
9  
10  
11  
12  
13  
14  
15  
16  
17  
18  
19  
20  
21  
22  
23  
24  
25  
26  
27  
28  
29  
30  
31  
32  
33  
34  
35  
36  
37  
38  
39  
40  
41  
42  
43  
44  
45  
46  
47  
48  
49  
50  
51  
52  
53  
54  
55  
56  
57  
58  
59  
60
- 13 Welsh Assembly Government. Interim evaluation of Communities First. 2006. <http://wales.gov.uk/dsjlg/research/c1stinterim/reporte.pdf?lang=en>
  - 14 Welsh Government. Evaluation of Communities First. 2011. <http://wales.gov.uk/docs/caecd/research/110913-evaluation-communities-first-en.pdf>
  - 15 Welsh Assembly Government. Evaluation of the Communities First Support Network. 2007. <http://wales.gov.uk/dsjlg/research/cfsupportnetwork/finalreport.pdf?lang=en>
  - 16 Fone DL, Dunstan F, White J, *et al.* Cohort Profile: The Caerphilly Health and Social Needs Electronic Cohort Study (E-CATALyST). *Int J Epidemiol* Published Online First: 5 November 2012. doi:10.1093/ije/dys175
  - 17 Oishi S, Rothman AJ, Snyder M, *et al.* The socioecological model of procommunity action: the benefits of residential stability. *J Pers Soc Psychol* 2007;**93**:831–44. doi:10.1037/0022-3514.93.5.831
  - 18 Connolly S, O'Reilly D, Rosato M. Increasing inequalities in health: Is it an artefact caused by the selective movement of people? *Social science & medicine* 2007;**64**:2008–15.
  - 19 Norman P, Boyle P, Rees P. Selective migration, health and deprivation: a longitudinal analysis. *Social Science & Medicine* 2005;**60**:2755–71.
  - 20 Craig P, Cooper C, Gunnell D, *et al.* Using natural experiments to evaluate population health interventions: new Medical Research Council guidance. *Journal of epidemiology and community health* Published Online First: 10 May 2012. doi:10.1136/jech-2011-200375
  - 21 Office for National Statistics. 2011 Census. Office for National Statistics. 2012. <http://www.ons.gov.uk/ons/rel/census/2011-census/population-and-household-estimates-for-wards-and-output-areas-in-england-and-wales/index.html> (accessed 11 Aug 2014).
  - 22 Ford D, Jones K, Verplancke JP, *et al.* The SAIL Databank: building a national architecture for e-health research and evaluation. *BMC health services research* 2009;**9**:157.
  - 23 Lyons R, Jones K, John G, *et al.* The SAIL databank: linking multiple health and social care datasets. *BMC medical informatics and decision making* 2009;**9**:3.
  - 24 Ware JE, Kosinski M, Dewey JE, *et al.* *SF-36 health survey: manual and interpretation guide*. Quality Metric Inc. 2000.
  - 25 Buckner JC. The development of an instrument to measure neighborhood cohesion. *American Journal of Community Psychology* 1988;**16**:771–91.
  - 26 Fone DL, Dunstan F, John A, *et al.* Associations between common mental disorders and the Mental Illness Needs Index in community settings Multilevel analysis. *BJP* 2007;**191**:158–63. doi:10.1192/bjp.bp.106.027458
  - 27 Ware JE, Kosinski M, Dewey JE. How to Score Version Two of the SF-36 Health Survey. *Lincoln, RI: QualityMetric* 2000.

- 1  
2  
3  
4  
5  
6  
7  
8  
9  
10  
11  
12  
13  
14  
15  
16  
17  
18  
19  
20  
21  
22  
23  
24  
25  
26  
27  
28  
29  
30  
31  
32  
33  
34  
35  
36  
37  
38  
39  
40  
41  
42  
43  
44  
45  
46  
47  
48  
49  
50  
51  
52  
53  
54  
55  
56  
57  
58  
59  
60
- 28 Ware Jr JE, Gandek B. Overview of the SF-36 health survey and the international quality of life assessment (IQOLA) project. *Journal of clinical epidemiology* 1998;**51**:903–12.
- 29 Kelly MJ, Dunstan FD, Lloyd K, *et al.* Evaluating cutpoints for the MHI-5 and MCS using the GHQ-12: A comparison of five different methods. *BMC Psychiatry* 2008;**8**:10.
- 30 Fone D, Greene G, Farewell D, *et al.* Common mental disorders, neighbourhood income inequality and income deprivation: small-area multilevel analysis. *BJP* 2013;**202**:286–93. doi:10.1192/bjp.bp.112.116178
- 31 Fone DL, Farewell DM, Dunstan FD. An ecometric analysis of neighbourhood cohesion. *Population Health Metrics* 2006;**4**:17.
- 32 Rose D, Pevalin DJ. *A researcher's guide to the national statistics socio-economic classification*. SAGE Publications Ltd 2003.
- 33 Welsh Assembly Government. Welsh Index of Multiple Deprivation 2005. Welsh Assembly Government 2005. <http://wales.gov.uk/docs/statistics/2005/051208wimd2005localreviseden.pdf>
- 34 Drummond MF, Sculpher MJ, Torrance GW. *Methods for the economic evaluation of health care programmes*. Oxford University Press, USA 2005.
- 35 Rasbash J, Browne W, Goldstein H, *et al.* *A user's guide to MLwiN*. University of London, Institute of Education, Centre for Multilevel Modelling 2000. <ftp://212.147.58.166/install/favre/documents%20r%E9cup%E9r%E9s/Folder111/Master%20en%20Sp%E9cialis%E9/Statistiques%20III%20-%20IV,%20Studer/StatisticsIV/MLwiNUserGuide.pdf> (accessed 29 Apr2014).
- 36 Stata | Stata 13. <http://www.stata.com/stata13/> (accessed 11 Aug2014).
- 37 Team RdC. R: A language and environment for statistical computing. *R foundation for Statistical Computing* Published Online First: 2005. [http://r-project.kr/sites/default/files/2%EA%B0%95%EA%B0%95%EC%A2%8C%EC%86%8C%EA%B0%9C\\_%EC%8B%A0%EC%A2%85%ED%99%94.pdf](http://r-project.kr/sites/default/files/2%EA%B0%95%EA%B0%95%EC%A2%8C%EC%86%8C%EA%B0%9C_%EC%8B%A0%EC%A2%85%ED%99%94.pdf) (accessed 29 Apr2014).
- 38 Marmot MG, Allen J, Goldblatt P, *et al.* Fair society, healthy lives: Strategic review of health inequalities in England post-2010. Published Online First: 2010. <http://eprints.ucl.ac.uk/111743/> (accessed 2 Sep2014).
- 39 Lyons RA, Ford DV, Moore L, *et al.* Use of data linkage to measure the population health effect of non-health-care interventions. *The Lancet* 2014;**383**:1517–9.

1  
2  
3  
4  
5  
6  
7  
8  
9  
10  
11  
12  
13  
14  
15  
16  
17  
18  
19  
20  
21  
22  
23  
24  
25  
26  
27  
28  
29  
30  
31  
32  
33  
34  
35  
36  
37  
38  
39  
40  
41  
42  
43  
44  
45  
46  
47  
48  
49  
50  
51  
52  
53  
54  
55  
56  
57  
58  
59  
60

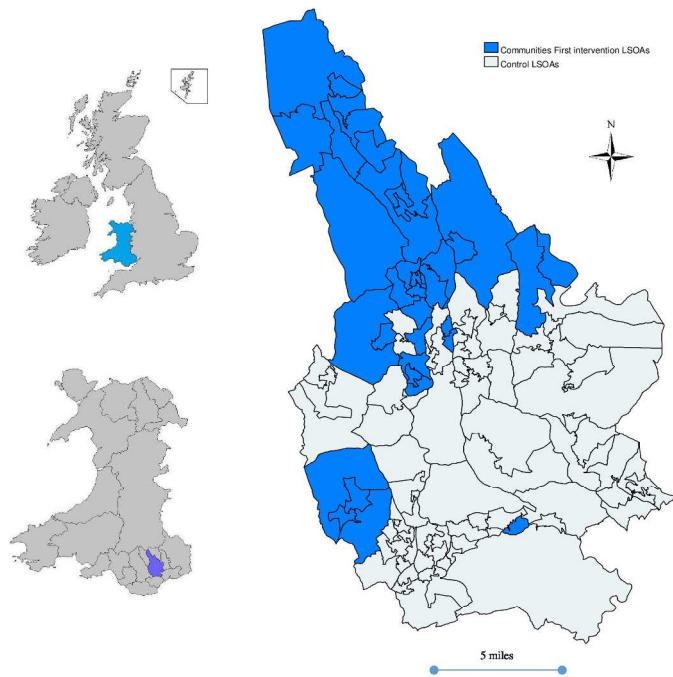

Figure 1: The 47 Communities First intervention LSOAs and 63 control LSOAs in Caerphilly County Borough (Wales, UK).  
209x297mm (300 x 300 DPI)



1  
2  
3  
4  
5  
6  
7  
8  
9  
10  
11  
12  
13  
14  
15  
16  
17  
18  
19  
20  
21  
22  
23  
24  
25  
26  
27  
28  
29  
30  
31  
32  
33  
34  
35  
36  
37  
38  
39  
40  
41  
42  
43  
44  
45  
46  
47  
48  
49  
50  
51  
52  
53  
54  
55  
56  
57  
58  
59  
60

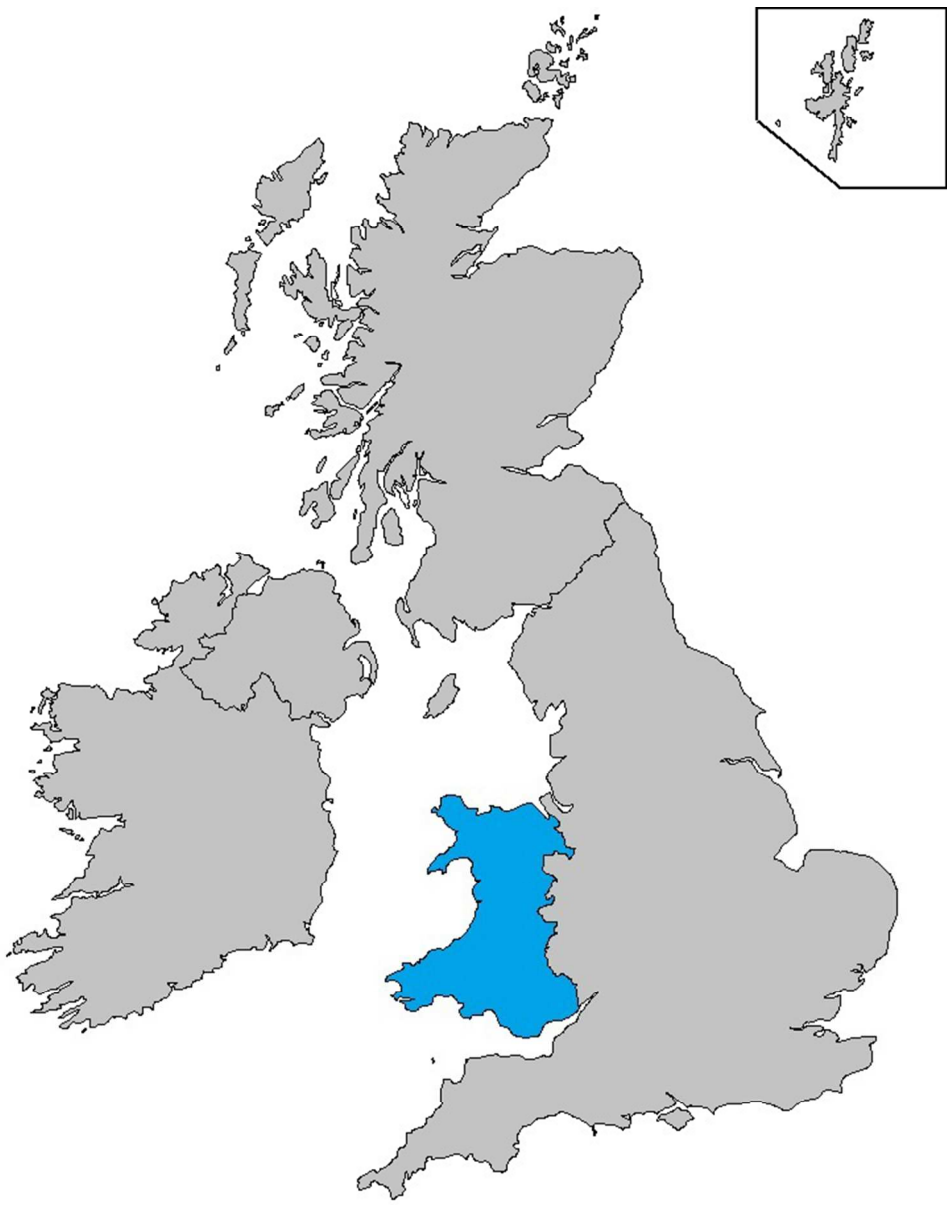

60x77mm (300 x 300 DPI)

1  
2  
3  
4  
5  
6  
7  
8  
9  
10  
11  
12  
13  
14  
15  
16  
17  
18  
19  
20  
21  
22  
23  
24  
25  
26  
27  
28  
29  
30  
31  
32  
33  
34  
35  
36  
37  
38  
39  
40  
41  
42  
43  
44  
45  
46  
47  
48  
49  
50  
51  
52  
53  
54  
55  
56  
57  
58  
59  
60

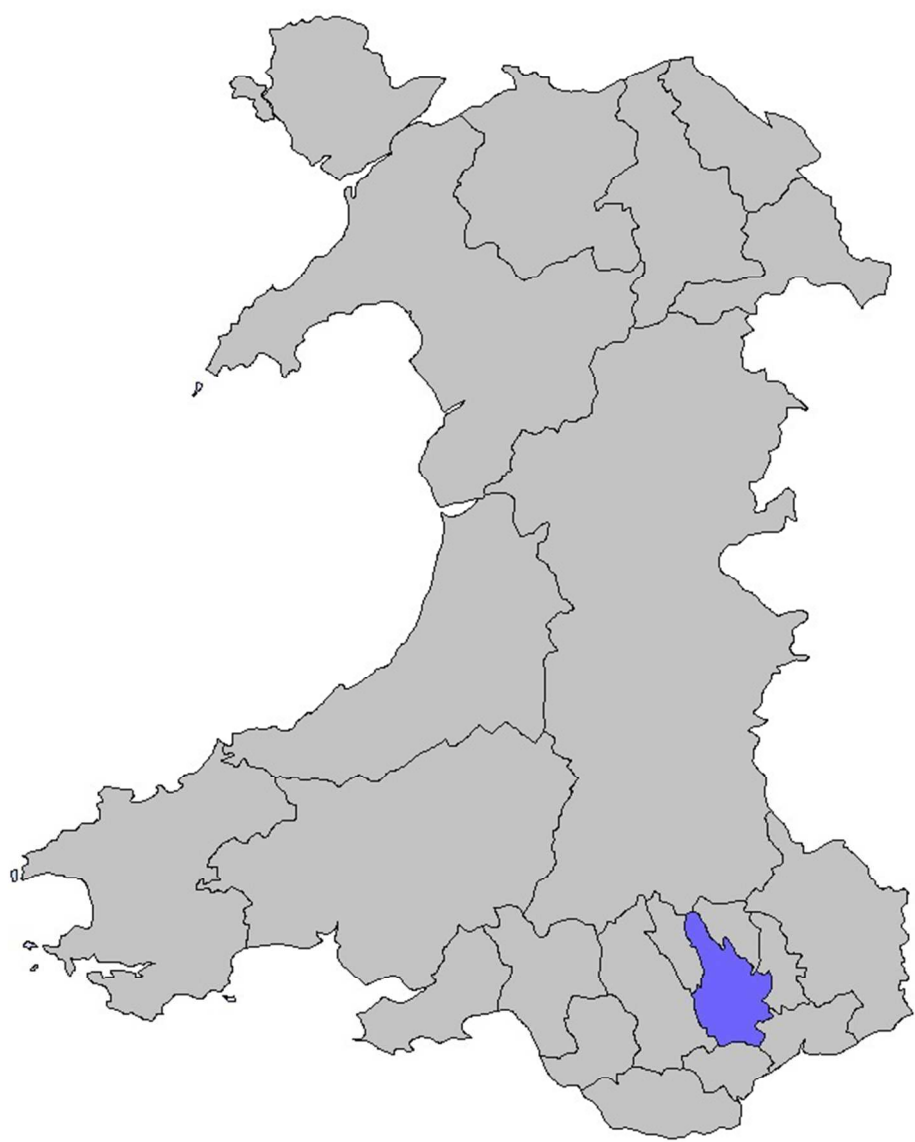

60x73mm (300 x 300 DPI)

1  
2  
3  
4  
5  
6  
7  
8  
9  
10  
11  
12  
13  
14  
15  
16  
17  
18  
19  
20  
21  
22  
23  
24  
25  
26  
27  
28  
29  
30  
31  
32  
33  
34  
35  
36  
37  
38  
39  
40  
41  
42  
43  
44  
45  
46  
47  
48  
49  
50  
51  
52  
53  
54  
55  
56  
57  
58  
59  
60

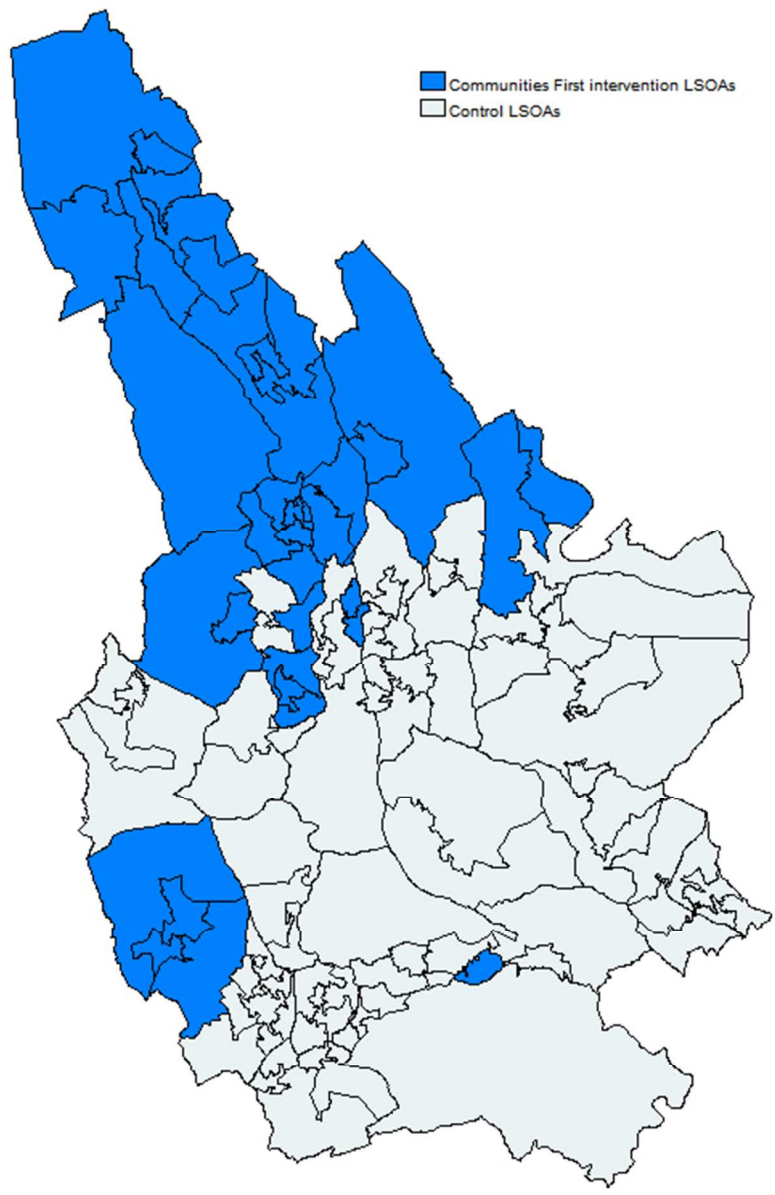

40x63mm (300 x 300 DPI)
